# Supplementary material for: Direct oxidative arylation via rhodium-catalyzed C–C bond cleavage of secondary alcohols with arylsilanes
Source: Royal Society of Chemistry journal article supplement (doi:10.1039/c2sc00923d), 2012-01-01

## SUPPORTING INFORMATION

For

# Highly Selective Direct Oxidative Arylation with Arylsilanes *via* Rhodium-Catalyzed C—C Bond Cleavage of Secondary Benzyl Alcohols Directed by Pyridinyl Group

Kang Chen,<sup>a</sup> Hu Li,<sup>a</sup> Yang Li,<sup>a</sup> Xi-Sha Zhang,<sup>a</sup> Zhi-Quan Lei,<sup>a,c</sup> and Zhang-Jie Shi<sup>\*a,b</sup>

---

<sup>a</sup> Beijing National Laboratory of Molecular Sciences (BNLMS) and Key Laboratory of Bioorganic Chemistry and Molecular Engineering of Ministry of Education, College of Chemistry and Green Chemistry Center, Peking University, Beijing 100871. <sup>b</sup> State Key Laboratory of Organometallic Chemistry Chinese Academy of Sciences, Shanghai 200032. <sup>c</sup> Chengdu Institute of Biology, Chinese Academy of Sciences Chengdu, Sichuan 610068, China.

## Table of Contents

|                                                            |                 |
|------------------------------------------------------------|-----------------|
| <b>Table of Contents</b>                                   | <b>1.</b>       |
| <b>General Experimental Section</b>                        | <b>2.</b>       |
| <b>General Experimental Procedures</b>                     | <b>3 - 4.</b>   |
| <b>Characterization of Alcohol Substrates 1 in Details</b> | <b>5 - 7.</b>   |
| <b>Characterization of Arylsilanes 2 in Details</b>        | <b>8.</b>       |
| <b>Characterization of Products 3 in Details</b>           | <b>9 -15.</b>   |
| <b>References</b>                                          | <b>16.</b>      |
| <b>NMR Spectral data</b>                                   | <b>17 - 46.</b> |

## General Experimental Section

**Analytic methods.**  $^1\text{H}$  NMR and  $^{13}\text{C}$  NMR data were obtained on Varian 300 M and Bruker 400 M nuclear resonance spectrometers unless otherwise specified, respectively.  $\text{CDCl}_3$  as solvent and tetramethylsilane (TMS) as the internal standard were employed. Chemical shifts were reported in units (ppm) by assigning TMS resonance in the  $^1\text{H}$  NMR spectrum as 0.00 ppm. The data of  $^1\text{H}$  NMR was reported as follows: chemical shift, multiplicity (s = singlet, d = doublet, t = triplet, m = multiplet and br = broad), coupling constant ( $J$  values) in Hz and integration. Chemical shifts for  $^{13}\text{C}$  NMR spectra were recorded in ppm from TMS using the central peak of  $\text{CDCl}_3$  (77.0 ppm) as the internal standard. Flash chromatography was performed using 200-300 mesh silica gel with the indicated solvent system according to standard techniques. Analytical thin-layer chromatography (TLC) was performed on pre-coated, glass-backed silica gel plates. Visualization of the developed chromatogram was performed by UV absorbance (254 nm). HRMS (ESI) analysis was performed by Analytical Instrumentation Center, Peking University.

**Source of Chemicals.**  $[\text{Cp}^*\text{Rh}(\text{CH}_3\text{CN})_3][\text{SbF}_6]_2$  was prepared from  $[\text{Cp}^*\text{RhCl}_2]_2$  (Sinocompound Technology Co., Ltd.) and  $\text{AgSbF}_6$  (Alfa Aesar)<sup>1</sup>.  $\text{AgF}$ , Trimethoxyphenyl silane and Triethoxyphenyl silane was purchased from Alfa Aesar. Other arylsilanes were prepared from corresponding Grignard reagents and tetraethoxysilane (Alfa Aesar)<sup>2</sup>. Alcohol substrates were synthesized by the reported method<sup>3</sup>. All the solvents were freshly distilled before used, and all the other reagents were directly used from purchased without any further purification unless otherwise specified.

## General Experimental Procedure

### General Procedure for Rh(III)-catalyzed oxidative arylation with arylsilanes via C—C Bond Cleavage of Secondary Benzyl Alcohols:

Under N<sub>2</sub> atmosphere, an oven-dried Schlenk tube containing a stir bar was charged with 1-phenyl-(4-methyl-2-(pyridin-2-yl))benzyl alcohol (**1a**) (55.1 mg, 0.20 mmol), [Cp<sup>\*</sup>Rh(CH<sub>3</sub>CN)<sub>3</sub>][SbF<sub>6</sub>]<sub>2</sub> (8.3 mg, 0.01 mmol) and AgF (101.5 mg, 0.80 mmol). Then THF (0.50 mL), PhSi(OMe)<sub>3</sub> (**2a**) (158.6 mg, 0.80 mmol) and *t*-BuOH (0.50 mL) were injected sequentially by syringe. The tube was placed on the parallel reactor and stirred at 90 °C for 16 hours. Then the mixture was cooled to room temperature and evaporated in vacuum. Further purification by flash chromatography on silica gel (hexane/EtOAc/CH<sub>2</sub>Cl<sub>2</sub> 50:1:1 to 20:1:1 gradually) afforded the product **3a** as a white solid (41.2 mg, 84%).

### Procedure for the deuterium labeling experiment:

Under N<sub>2</sub> atmosphere, an oven-dried Schlenk tube containing a stir bar was charged with 1-phenyl-(3,4,5,6-4D-2-(pyridin-2-yl))benzyl alcohol (**7**) (26.5 mg, 0.10 mmol), [Cp<sup>\*</sup>Rh(CH<sub>3</sub>CN)<sub>3</sub>][SbF<sub>6</sub>]<sub>2</sub> (4.2mg, 0.005 mmol) and AgF (50.7 mg, 0.40 mmol). Then THF (0.50 mL), PhSi(OMe)<sub>3</sub> (**2a**) (79.3mg, 0.40 mmol) and *t*-BuOH (0.50 mL) were injected sequentially by syringe. The tube was placed on the parallel reactor and stirred at 90 °C for 16 hours. Then the mixture was cooled to room temperature and evaporated in vacuum. Further purification by flash chromatography on silica gel (hexane/EtOAc/CH<sub>2</sub>Cl<sub>2</sub> 50:1:1 to 20:1:1 gradually) afforded a mixture of monoaryl (**3ba-d<sub>4</sub>**) and diaryl product (**3ba'-d<sub>4</sub>**). (13.2 mg, 49% for **3ba-d<sub>4</sub>** 9:1 in <sup>1</sup>H NMR). <sup>1</sup>H NMR (400 MHz, CDCl<sub>3</sub>): δ = 8.63 (d, *J* = 4.0 Hz, 1H), 8.30 (d, *J* = 4.0 Hz, 0.11H), 7.70 (s, 0.97H), 7.38 (td, *J* = 8.4, 1.6 Hz, 1H), 7.22 (m, 3H), 7.17-7.08 (m, 4H), 6.89 (d, *J* = 8.0 Hz, 1.23H). HRMS: *m/z*: [M + H]<sup>+</sup> calculated for C<sub>17</sub>H<sub>11</sub>D<sub>3</sub>N: 235.13091; found 235.13070 and C<sub>23</sub>H<sub>15</sub>D<sub>3</sub>N: 311.16221; found: 311.16156. 97% H/D crossover was observed.

### Procedure for the competition experiment of C—C cleavage versus C—H activation:

Under N<sub>2</sub> atmosphere, 1-phenyl-(4-methyl-2-(pyridin-2-yl))benzyl alcohol (**1a**) (55.1 mg, 0.20 mmol), 2-(3-ethylphenyl)pyridine (**8**) (36.6 mg, 0.20 mmol), [Cp<sup>\*</sup>Rh(CH<sub>3</sub>CN)<sub>3</sub>][SbF<sub>6</sub>]<sub>2</sub> (8.3 mg, 0.01 mmol) and AgF (101.5 mg, 0.80 mmol) were charged into an oven-dried Schlenk tube. Then THF (0.50 mL), PhSi(OMe)<sub>3</sub> (**2a**) (79.3mg, 0.40 mmol) and *t*-BuOH (0.50 mL) were injected sequentially by syringe. The tube was placed on the parallel reactor and stirred at 90 °C for 2 h. Then the mixture was cooled to room temperature and evaporated in vacuum. Further purification by flash chromatography on silica gel (hexane/EtOAc/CH<sub>2</sub>Cl<sub>2</sub> 50:1:1 to 20:1:1 gradually) afforded the mixture of 2-(3-ethylphenyl)pyridine (**8**) and 2-(3-ethylphmnyl)pyridine (**5**) (25.5 mg), mixture of 2-(4-methylbiphenyl-2-yl)pyridine (**3aa**) and 2-(4-ethylbiphenyl-2-yl)pyridine (**3ja**) (31.6 mg), respectively.

<sup>1</sup>H NMR (400 MHz, CDCl<sub>3</sub>) of mixture **5** and **8**: δ = 8.69 (m, 1.23 H), 7.87-7.84 (m, 1.25H), 7.76- 7.13 (m, 3.79H), 7.40-7.34 (m, 1.28H), 7.26-7.19 (m, 2.62H), 2.74 (q, *J* = 7.2 Hz, 2H), 2.43 (s, 0.81H), 1.29 (t, *J* = 7.6 Hz, 3H).

The ratio of **5** and **8** = 1 : 3.7, the yield of **5** was 15%, and 56% **8** was recovered.

<sup>1</sup>H NMR (400 MHz, CDCl<sub>3</sub>) of mixture **3aa** and **3ja**: δ = 8.64-8.63 (m, 1.13H), 7.54-7.53 (m,

1.12H), 7.37-7.32 (m, 2.41H), 7.28-7.25 (m, 1.23H), 7.21-7.19 (m, 3.38H), 7.15-7.12 (m, 2.30), 7.09-7.06 (m, 1.17H), 2.75 (q,  $J = 7.6$  Hz, 0.31H), 2.44 (s, 3H), 1.31 (t,  $J = 7.6$  Hz, 0.53H).

The ratio of **3aa** and **3ja** = 6.4 : 1, theyield of **3aa** and **3ja** was 55% and 9% respectively.

**Procedure for the Rh(III) catalyzed directed C—H arylation:**

Under N<sub>2</sub> atmosphere, 2-(3-ethylphmnyl)pyridine (**5**) (33.8 mg, 0.20 mmol), [Cp\*Rh(CH<sub>3</sub>CN)<sub>3</sub>][SbF<sub>6</sub>]<sub>2</sub> (4.2 mg, 0.005 mmol) and AgF (50.7 mg, 0.40 mmol) were charged into an oven-dried Schlenk tube. Then THF (0.50 mL), PhSi(OMe)<sub>3</sub> (**2a**) (79.3mg, 0.40 mmol) and *t*-BuOH (0.50 mL) were injected sequently by syringe. The tube was placed on the parallel reactor and stirred at 90 °C for 16 h. Then the mixture was cooled to room temperature and evaporated in vacuum. Further purification by flash chromatography on silica gel (hexane/EtOAc/CH<sub>2</sub>Cl<sub>2</sub> 50:1:1 to 20:1:1 gradually) afforded the product **3aa** (30.6 mg, 62%). For 2-phenylpyridine (**5'**), a mixture of monoaryl (**3ba**) and diaryl product (**3ba'**) was obtained (24.5 mg, 44% for **3ba**, **3ba** : **3ba'** = 6.6 : 1 by <sup>1</sup>H NMR)

### Characterization of alcohol substrates **1**

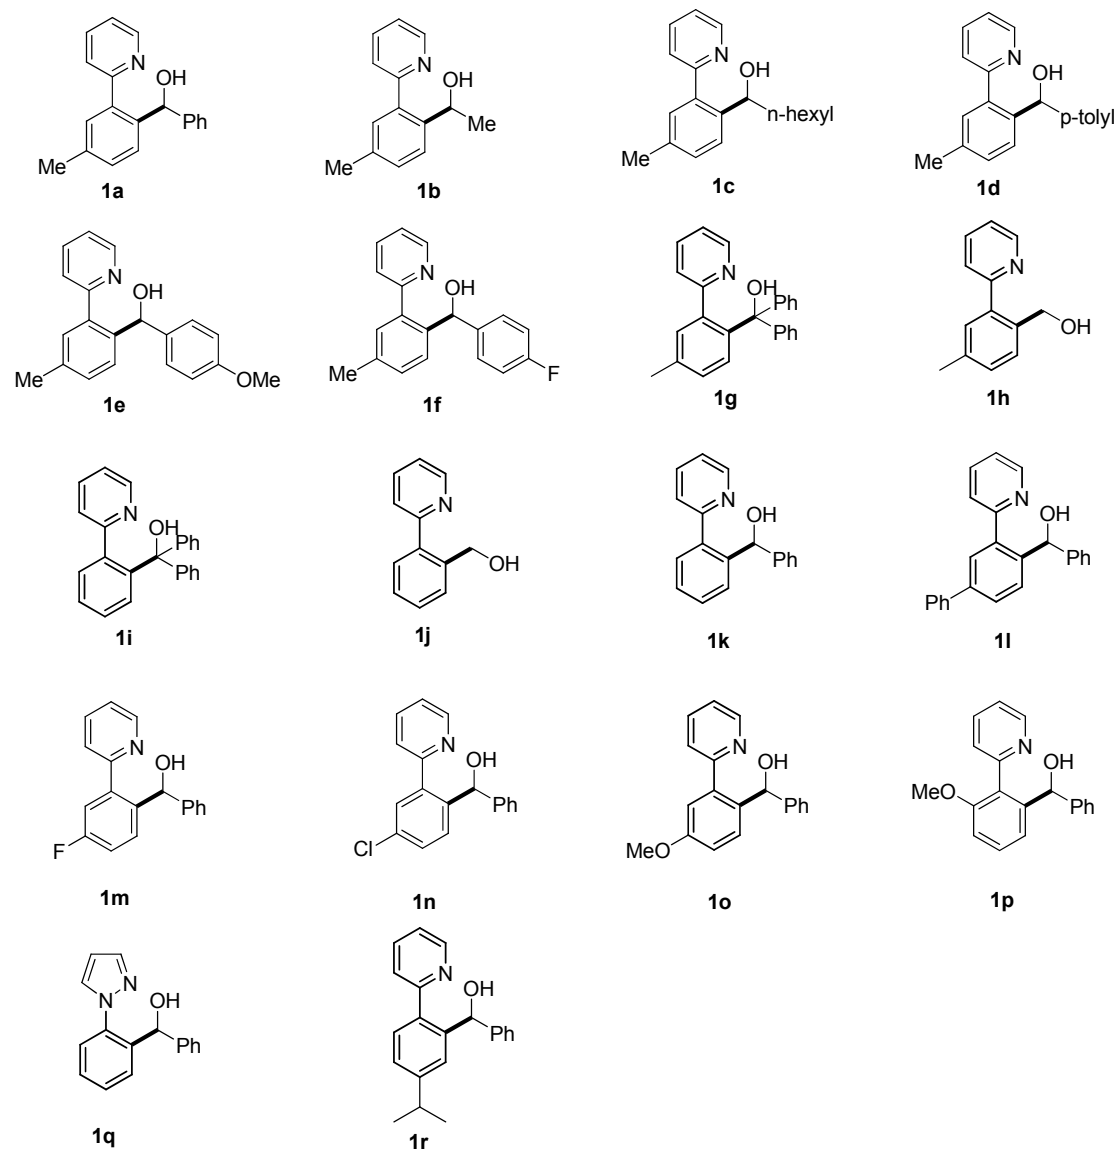

All the alcohol substrates were prepared by the methods reported in in reference 3 except **1h**, which was obtained from the reduction of ethyl 4-methyl-2-(pyridin-2-yl)benzoate(see ref 4). Among the alcohol substrates, **1b**, **1d**, **1e**, **1f**, **1g**, **1h**, **1o** and **1p** have not been reported. The rest ones were all characterized in reference 3.

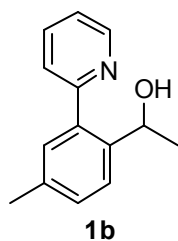

**1-(4-methyl-2-(pyridin-2-yl)phenyl)ethanol (1b)**. Yellow oil.  $^1\text{H}$  NMR (300 MHz,  $\text{CDCl}_3$ ): 8.62 (d,  $J = 3.9$  Hz, 1H), 7.83 (t,  $J = 7.5$ , 1H), 7.58-7.48 (m, 2H), 7.33-7.28 (m, 3H), 6.37 (br,

1H), 4.76-4.69 (q,  $J = 6.6$  Hz, 1H), 2.40 (s, 3H), 1.49 (d,  $J = 6.6$  Hz, 3H).  $^{13}\text{C}$  NMR (75 MHz,  $\text{CDCl}_3$ ): 159.9, 147.8, 140.5, 139.4, 137.4, 137.1, 131.3 (2C), 129.7, 126.4, 124.1, 122.0. 66.5, 21.0, 20.4. HRMS:  $m/z$ :  $[\text{M} + \text{H}]^+$  calculated for  $\text{C}_{14}\text{H}_{16}\text{NO}$ : 212.12264; found: 212.12242.

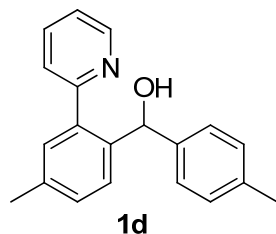

**(4-methyl-2-(pyridin-2-yl)phenyl)(p-tolyl)methanol (1d).** Slabby oil.  $^1\text{H}$  NMR (300 MHz,  $\text{CDCl}_3$ ):  $\delta = 8.58$  (d, 1H,  $J = 4.5$  Hz), 7.75 (td,  $J = 7.8, 1.2$  Hz, 1H), 7.49-7.46 (d,  $J = 7.8$  Hz, 1H), 7.27-7.23 (m, 2H), 7.18-7.15 (m, 3H), 7.08-7.01 (m, 3H), 5.75 (s, 1H), 2.38 (s, 3H), 2.28 (s, 3H).  $^{13}\text{C}$  NMR (100 MHz,  $\text{CDCl}_3$ ):  $\delta = 159.8, 147.6, 141.2, 139.9, 139.5, 137.4, 137.3, 135.8, 131.4, 129.8, 129.6, 128.3, 126.3, 124.1, 122.0, 21.0$ . HRMS:  $m/z$ :  $[\text{M} + \text{H}]^+$  calculated for  $\text{C}_{20}\text{H}_{20}\text{NO}$ : 290.15394; found: 290.15390.

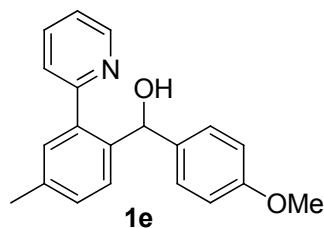

**(4-methoxyphenyl)(4-methyl-2-(pyridin-2-yl)phenyl)methanol (1e).** Slabby oil.  $^1\text{H}$  NMR (300 MHz,  $\text{CDCl}_3$ ):  $\delta = 8.50$ -8.49 (m, 1H), 7.64 (td,  $J = 7.8, 1.8$  Hz, 1H), 7.40 (d,  $J = 7.8$  Hz, 1H), 7.22-7.06 (m, 7H), 6.72 (d,  $J = 8.7$  Hz, 2H), 5.73 (s, 1H), 3.67 (s, 3H), 2.33 (s, 3H).  $^{13}\text{C}$  NMR (100 MHz,  $\text{CDCl}_3$ ):  $\delta = 159.5, 157.9, 147.3, 141.0, 139.4, 137.1, 137.0, 135.1, 131.1, 129.4, 129.3, 127.2, 123.9, 121.8, 112.9, 73.0, 54.9, 20.8$ . HRMS:  $m/z$ :  $[\text{M} + \text{H}]^+$  calculated for  $\text{C}_{20}\text{H}_{20}\text{NO}_2$ : 306.14940; found: 306.14886.

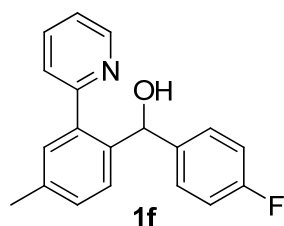

**(4-fluorophenyl)(4-methyl-2-(pyridin-2-yl)phenyl)methanol (1f).** White solid.  $^1\text{H}$  NMR (300 MHz,  $\text{CDCl}_3$ ):  $\delta = 8.56$ -8.54 (dt,  $J = 5.1, 0.9$  Hz, 1H), 7.74 (t,  $J = 7.8$  Hz, 1H), 7.45-7.42 (dd,  $J = 0.9, 7.8$  Hz, 1H), 7.27-7.16 (m, 5H), 7.09-7.07 (d,  $J = 7.8$  Hz, 1H), 6.86 (t,  $J = 8.4$  Hz, 2H), 2.39 (s, 3H).  $^{13}\text{C}$  NMR (100 MHz,  $\text{CDCl}_3$ ):  $\delta = 161.5$  (d,  $J = 242.5$  Hz), 159.7, 147.4, 140.8, 139.5, 138.9 (d,  $J = 2.8$  Hz), 137.6, 137.5, 131.6, 130.0, 129.7, 127.8 (2C), 124.1, 122.1, 114.3 (d,  $J = 21.1$  Hz), 73.5, 21.0. HRMS:  $m/z$ :  $[\text{M} + \text{H}]^+$  calculated for  $\text{C}_{19}\text{H}_{17}\text{FNO}$ : 294.12887; found 294.12883.

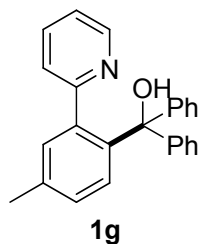

**(4-methyl-2-(pyridin-2-yl)phenyl)diphenylmethanol (1g).** White solid.  $^1\text{H}$  NMR (400 MHz,  $\text{CDCl}_3$ ):  $\delta$  = 9.13 (s, 1H), 8.28 (d,  $J$  = 4.4 Hz, 1H), 7.47 (td,  $J$  = 7.6, 1.6 Hz, 1H), 7.33-7.31 (m, 4H), 7.20 (s, 1H), 7.13-7.09 (m, 5H), 7.06-7.03 (m, 3H), 6.94 (m, 1H), 6.74 (d,  $J$  = 8.0 Hz, 1H).  $^{13}\text{C}$  NMR (100 MHz,  $\text{CDCl}_3$ ):  $\delta$  = 161.4, 147.2, 146.3, 144.9, 140.1, 137.1(2C), 133.1, 130.3, 128.7, 127.6, 127.3, 126.2, 125.0, 121.4, 81.3, 20.8.

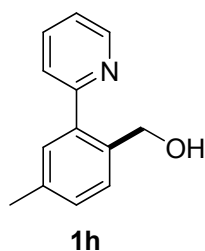

**(4-methyl-2-(pyridin-2-yl)phenyl)methanol (1h).** Yellow oil.  $^1\text{H}$  NMR (400 MHz,  $\text{CDCl}_3$ ):  $\delta$  = 8.62 (d,  $J$  = 3.6 Hz, 1H), 7.83 (t,  $J$  = 7.2 Hz, 1H), 7.61 (d,  $J$  = 7.6 Hz, 1H), 7.38-7.21 (m, 4H), 6.30 (br, 1H), 4.43 (s, 2H), 2.40 (s, 3H).  $^{13}\text{C}$  NMR (100 MHz,  $\text{CDCl}_3$ ):  $\delta$  = 159.3, 147.9, 139.7, 137.7, 137.5, 137.4, 131.1, 130.8, 129.8, 123.7, 122.1, 64.2, 21.1. HRMS:  $m/z$ :  $[\text{M} + \text{H}]^+$  calculated for  $\text{C}_{13}\text{H}_{14}\text{NO}$ : 200.10699; found: 200.10674.

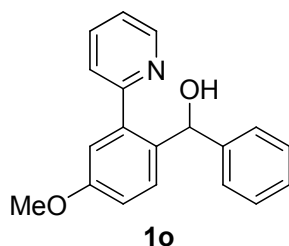

**(4-methoxy-2-(pyridin-2-yl)phenyl)(phenyl)methanol (1o).** White solid.  $^1\text{H}$  NMR (300 MHz,  $\text{CDCl}_3$ ):  $\delta$  = 8.59-8.57 (m, 1H), 7.74 (td,  $J$  = 7.5, 1.8 Hz, 1H), 7.43 (dt,  $J$  = 8.1, 0.9 Hz, 1H), 7.26-7.11 (m, 7H), 7.00-6.98 (m, 2H), 6.89-6.86 (dd,  $J$  = 2.7, 8.4 Hz), 5.76 (s, 1H), 3.84 (s, 1H).  $^{13}\text{C}$  NMR (100 MHz,  $\text{CDCl}_3$ ):  $\delta$  = 159.4, 158.8, 147.6, 143.2, 141.0, 137.4, 136.3, 131.3, 127.6, 126.3, 124.0, 122.2, 116.7, 113.5, 73.4, 55.4. HRMS:  $m/z$ :  $[\text{M} + \text{H}]^+$  calculated for  $\text{C}_{19}\text{H}_{18}\text{NO}_2$ : 292.13320; found: 292.13274.

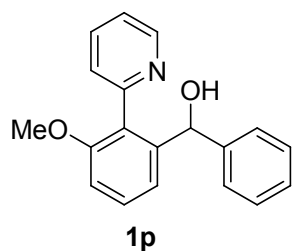

**(3-methoxy-2-(pyridin-2-yl)phenyl)(phenyl)methanol (1p).** slight pink solid.  $^1\text{H}$  NMR (300 MHz,  $\text{CDCl}_3$ ):  $\delta$  = 8.54-8.52 (m, 1H), 7.54 (td,  $J$  = 12.3, 1.8 Hz, 1H), 7.27 (t,  $J$  = 7.5 Hz, 2H), 7.19-7.07 (m, 6H), 6.88 (dd,  $J$  = 2.1, 6.3 Hz, 2H), 5.56 (s, 1H), 3.66 (s, 3H).  $^{13}\text{C}$  NMR (100 MHz,  $\text{CDCl}_3$ ):  $\delta$  = 156.5, 155.4, 147.7, 145.0, 142.8, 135.4, 129.3, 128.3, 127.2, 126.9, 126.0, 125.8, 121.6, 121.1, 110.2, 73.1, 55.3. HRMS:  $m/z$ :  $[\text{M} + \text{H}]^+$  calculated for  $\text{C}_{19}\text{H}_{18}\text{NO}_2$ : 292.13375; found: 292.13270.



## Characterization of Arylsilanes 2

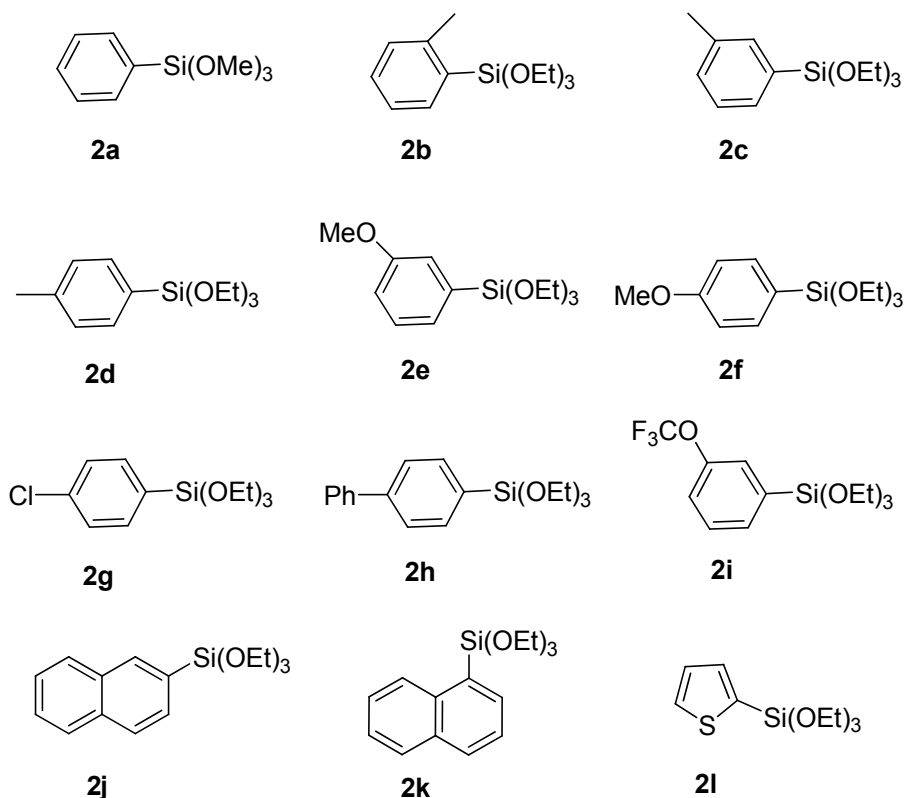

All the arylsilanes except triethoxyl(3-(trifluoromethoxy)phenyl)silane (**2i**) in this work were known compounds (**2a-2f** in ref. 2, **2g** and **2h** in ref. 4, **2j** in ref. 5, **2k** in ref. 6, **2l** in ref. 7). The spectral data match those reported previously.

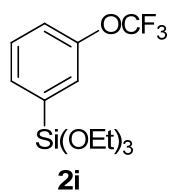

**triethoxyl(3-(trifluoromethoxy)phenyl)silane (2i)**. Yellow liquid.  $^1\text{H}$  NMR (300 MHz,  $\text{CDCl}_3$ ):  $\delta$  = 7.60-7.57 (td,  $J$  = 0.9, 7.2 Hz, 1H), 7.50 (m, 1H), 7.41 (t,  $J$  = 8.1 Hz, 1H), 7.29-7.25 (m, 1H), 3.88 (q,  $J$  = 6.9 Hz, 6H), 1.25 (t,  $J$  = 6.9 Hz, 9H).  $^{13}\text{C}$  NMR (100 MHz,  $\text{CDCl}_3$ ): 149.1 (d,  $J$  = 1.6 Hz), 134.2, 133.0, 129.4, 126.9, 122.7, 120.5 (q,  $J$  = 255.3 Hz), 58.9, 18.1. HRMS:  $m/z$ :  $[\text{M} + \text{Na}]^+$  calculated for  $\text{C}_{13}\text{H}_{20}\text{F}_3\text{O}_4\text{SiNa}$ : 347.08969; found 347.08941.

### Characterization of Products 3

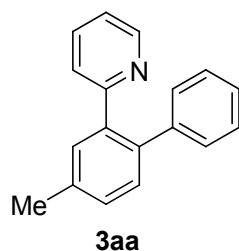

**2-(4-methylbiphenyl-2-yl)pyridine (3aa).** White solid (41.2mg, 84%).  $^1\text{H}$  NMR (300 MHz,  $\text{CDCl}_3$ ):  $\delta$  = 8.63 (dt,  $J$  = 4.8, 0.9 Hz), 7.53 (s, 1H), 7.37-7.07 (m, 9H), 6.85 (dd,  $J$  = 0.9, 8.1 Hz, 1H), 2.44 (s, 3H).  $^{13}\text{C}$  NMR (75 MHz,  $\text{CDCl}_3$ ):  $\delta$  = 159.3, 149.3, 141.2, 139.2, 137.7, 137.3, 135.0, 131.0, 130.4, 129.7, 129.2, 127.9, 126.4, 125.4, 121.2, 21.0.

For the reaction between **1a** and  $\text{PhSi}(\text{OEt})_3$  (**2a'**): **3aa** (37.7 mg, 77%)

For the reaction between **1b** and **2a**: 42.9 mg (0.20 mmol) **1b** was used. **3aa** (30.1 mg, 61%).

For the reaction between **1c** and **2a**: 50.9 mg (0.20 mmol) **1c** was used. **3aa** (23.3 mg, 47%).

For the reaction between **1d** and **2a**: 55.5 mg (0.19 mmol) **1d** was used. **3aa** (25.7 mg, 55%).

For the reaction between **1e** and **2a**: 47.4 mg (0.16 mmol) **1e** was used. **3aa** (32.1 mg, 84%).

For the reaction between **1f** and **2a**: 58.7 mg (0.20 mmol) **1f** was used. **3aa** (34.3 mg, 70%).

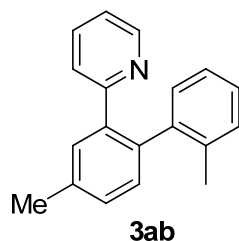

**2-(2',4'-dimethylbiphenyl-2-yl)pyridine (3ab).** White solid (41.2 mg, 79%).  $^1\text{H}$  NMR (300 MHz,  $\text{CDCl}_3$ ):  $\delta$  = 8.61 (d,  $J$  = 4.8 Hz, 1H), 7.63 (s, 1H), 7.30-7.24 (m, 2H), 7.19 (s, 1H), 7.17-7.12 (m, 3H), 7.07-7.00 (m, 2H), 6.85 (td,  $J$  = 8.1, 0.9 Hz), 2.46 (s, 3H), 1.88 (s, 3H).  $^{13}\text{C}$  NMR (100 MHz,  $\text{CDCl}_3$ ):  $\delta$  = 158.8, 149.3, 141.1, 139.5, 137.3 (2C), 136.0, 135.0, 130.5 (3C), 129.8, 129.0, 127.1, 125.5, 124.5, 121.2, 21.1, 19.9. HRMS:  $m/z$ :  $[\text{M} + \text{H}]^+$  calculated for  $\text{C}_{19}\text{H}_{18}\text{N}$ : 260.14338; found: 260.14309.

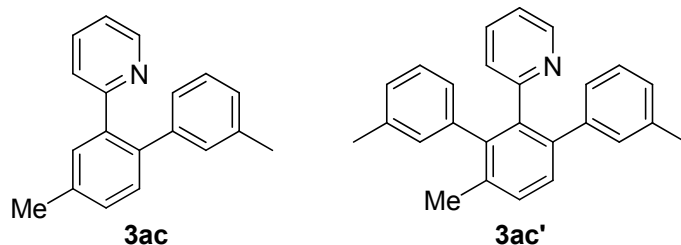

**2-(3',4'-dimethylbiphenyl-2-yl)pyridine (3ac).** White solid (50.1 mg, 82%, **3ac** : **3ac'** = 7.7 : 1 by  $^1\text{H}$  NMR).  $^1\text{H}$  NMR (300 MHz,  $\text{CDCl}_3$ ):  $\delta$  = 8.63 (d,  $J$  = 4.2, 1H), 7.51 (s, 1H), 7.39-7.25 (m, 3H), 7.10-7.05 (m, 2H), 7.00 (m, 2H), 2.43 (s, 3H), 2.24 (s, 3H).  $^{13}\text{C}$  NMR (100 MHz,  $\text{CDCl}_3$ ):  $\delta$  = 159.4, 149.2, 141.2, 139.2, 137.9, 137.5, 137.2, 135.0, 131.0, 130.4 (2C), 129.2,

127.8, 127.2, 126.8, 125.4, 121.2, 21.3, 21.1. HRMS:  $m/z$ :  $[M + H]^+$  and calculated for **3ac**  $C_{19}H_{18}N$ : 260.14338; found 260.14345 and **3ac'**  $[M + H]^+$  calculated for  $C_{26}H_{24}N$ : 350.10933; found 350.19018.

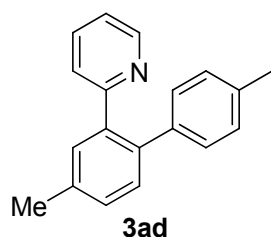

**2-(4,4'-dimethylbiphenyl-2-yl)pyridine (3ad)**. White solid (46.0 mg, 89%).  $^1H$  NMR (300 MHz,  $CDCl_3$ ):  $\delta$  = 8.65(d,  $J$  = 4.2 Hz, 1H), 7.52 (s, 1H), 7.38 (td,  $J$  = 7.8, 1.8 Hz, 1H), 7.33-7.25 (m, 2H), 7.11 (ddd,  $J$  = 7.5, 5.1, 1.2 Hz, 1H), 7.02(s, 4H), 6.88 (d,  $J$  = 7.8, 1H), 2.43 (s, 3H), 2.30 (s, 3H).  $^{13}C$  NMR (100 MHz,  $CDCl_3$ ):  $\delta$  = 159.5, 149.3, 139.2, 138.3, 137.7, 137.1, 136.1, 135.0, 131.0, 130.4, 129.5, 129.2, 128.7, 125.4, 121.1, 21.0 (2C). HRMS:  $m/z$ :  $[M + H]^+$  calculated for  $C_{19}H_{18}N$ : 260.14338; found: 260.14312.

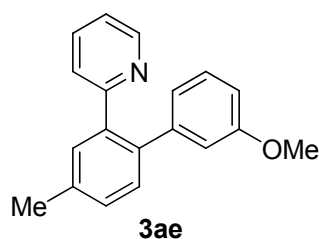

**2-(3'-methoxy-4-methylbiphenyl-2-yl)pyridine (3ae)**. Colorless oil (39.6 mg, 72%).  $^1H$  NMR (300 MHz,  $CDCl_3$ ):  $\delta$  = 8.63 (m, 1H), 7.52 (m, 1H), 7.40-7.33 (m, 2H), 7.28-7.25 (m, 1H), 7.15-7.07 (m, 2H), 6.89 (d,  $J$  = 5.1 Hz, 1H), 6.77-6.73 (m, 2H), 6.66 (m, 1H), 3.62 (s, 3H), 2.44 (s, 3H).  $^{13}C$  NMR (100 MHz,  $CDCl_3$ ):  $\delta$  = 159.4, 159.2, 149.3, 142.7, 139.3, 137.7, 137.5, 135.2, 131.0, 130.3, 129.3, 129.0, 125.4, 122.2, 121.3, 115.0, 112.7, 55.0, 21.0. HRMS:  $m/z$ :  $[M + H]^+$  calculated for  $C_{19}H_{18}NO$ : 276.13829; found: 276.13819.

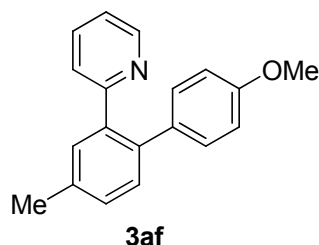

**2-(4'-methoxy-4-methylbiphenyl-2-yl)pyridine (3af)**. White solid (53.1 mg, 96%).  $^1H$  NMR (300 MHz,  $CDCl_3$ ):  $\delta$  = 8.66 (d,  $J$  = 4.8, 1H), 7.53 (s, 1H), 7.39 (td,  $J$  = 7.8, 1.5 Hz, 1H), 7.34-7.28 (m, 2H), 7.13-7.06 (m, 3 H), 6.89 (d,  $J$  = 7.8, 1H), 6.80-6.77 (m, 2H), 3.79 (s, 3H), 2.46 (s, 3H).  $^{13}C$  NMR (100 MHz,  $CDCl_3$ ):  $\delta$  = 159.5, 158.4, 149.3, 139.1, 137.4, 136.9, 135.1, 133.7, 131.0, 130.7, 130.3, 129.2, 125.4, 121.1, 113.5, 55.1, 21.0. HRMS:  $m/z$ :  $[M + H]^+$  calculated for  $C_{19}H_{18}NO$ : 276.13829; found: 276.13805.

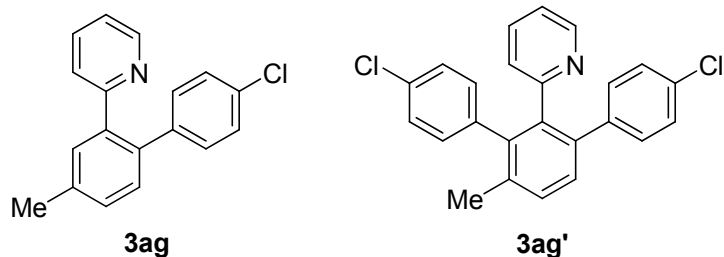

**2-(4'-chloro-4-methylbiphenyl-2-yl)pyridine (3ag).** White solid (54.9 mg, 67%, **3ag** : **3ag'** = 7.7 : 1 by  $^1\text{H}$  NMR).  $^1\text{H}$  NMR (300 MHz,  $\text{CDCl}_3$ ):  $\delta$  = 8.63 (d,  $J$  = 4.8, 1H), 7.49 (s, 1H), 7.42 (td,  $J$  = 7.5, 1.8 Hz, 1H), 7.27-7.25(m, 2H), 7.19-7.16 (m, 2H), 7.12 (dd,  $J$  = 7.5, 4.8 Hz, 1H), 7.07-7.03 (m, 2H), 6.88 (d,  $J$  = 7.8 Hz, 1H), 2.43 (s, 3H).  $^{13}\text{C}$  NMR (100 MHz,  $\text{CDCl}_3$ ):  $\delta$  = 159.1, 149.4, 139.8, 139.2, 137.7, 136.5, 135.3, 132.6, 131.1, 130.9, 130.2, 129.3, 128.2, 125.3, 121.4, 21.0. HRMS:  $m/z$ :  $[\text{M} + \text{H}]^+$  calculated for  $\text{C}_{18}\text{H}_{15}\text{ClN}$ : 280.08875; found: 280.08862. and **3ag'**:  $[\text{M} + \text{H}]^+$  calculated for  $\text{C}_{24}\text{H}_{18}\text{Cl}_2\text{N}$ : 390.08108; found: 390.08089.

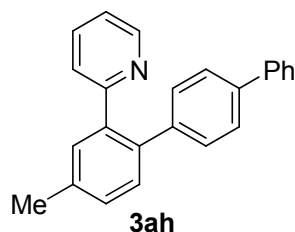

**2-(4'-phenyl-4-methylbiphenyl-2-yl)pyridine (3ah).** White solid (51.8 mg, 81%).  $^1\text{H}$  NMR (300 MHz,  $\text{CDCl}_3$ ):  $\delta$  = 8.64 (d,  $J$  = 4.8 Hz, 1H), 7.59-7.54 (m, 3H), 7.48-7.29 (m, 8H), 7.22-7.19 (m, 2H), 7.08 (ddd,  $J$  = 7.5, 5.1, 1.2 Hz, 1H), 6.93 (d,  $J$  = 7.8 Hz, 1H), 2.46 (s, 3H).  $^{13}\text{C}$  NMR (100 MHz,  $\text{CDCl}_3$ ):  $\delta$  = 159.4, 149.4, 140.6, 140.3, 139.3, 139.2, 137.5, 137.3, 135.2, 131.2, 130.4, 130.1, 129.3, 128.7, 127.2, 126.9, 126.7, 125.5, 121.3, 21.1. HRMS:  $m/z$ :  $[\text{M} + \text{H}]^+$  calculated for  $\text{C}_{24}\text{H}_{20}\text{N}$ : 322.15903; found: 322.15884.

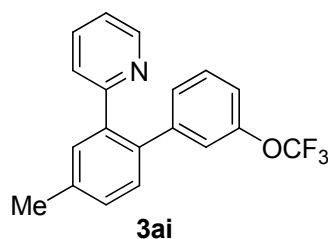

**2-(4-methyl-3'-(trifluoromethoxy)biphenyl-2-yl)pyridine (3ai).** Colorless oil (60.4 mg, 92%).  $^1\text{H}$  NMR (300 MHz,  $\text{CDCl}_3$ ):  $\delta$  = 8.61 (m, 1H), 7.51 (s, 1H), 7.40 (td,  $J$  = 7.8, 1.8 Hz), 7.34-7.22 (m, 3H), 7.13-7.02 (m, 3H), 6.94-6.87 (m, 2H), 2.44 (s, 3H).  $^{13}\text{C}$  NMR (100 MHz,  $\text{CDCl}_3$ ):  $\delta$  = 158.9, 149.5, 148.8 (d,  $J$  = 1.7), 143.4, 139.4, 138.1, 136.2, 135.4, 131.3, 130.2, 129.4 (d,  $J$  = 5.1 Hz), 128.0, 125.2, 122.3, 122.0, 121.5, 120.3 (q,  $J$  = 255.6), 119.0, 21.1. HRMS:  $m/z$ :  $[\text{M} + \text{H}]^+$  calculated for  $\text{C}_{19}\text{H}_{15}\text{F}_3\text{NO}$ : 330.11003; found: 330.11011.

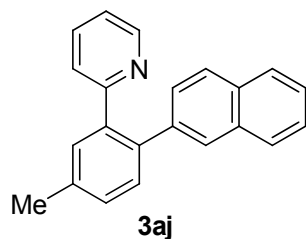

**2-(5-methyl-2-(naphthalen-2-yl)phenyl)pyridine (3aj).** Yellow solid (54.2 mg, 92%).  $^1\text{H}$  NMR (300 MHz,  $\text{CDCl}_3$ ):  $\delta$  = 8.64 (d,  $J$  = 5.1 Hz, 1H), 7.77-7.73 (m, 3H), 7.63-7.57 (m, 2H), 7.44-7.40 (m, 3H), 7.32-7.23 (m, 2H), 7.14 (dd,  $J$  = 1.8, 8.4, 1H), 7.04 (ddd,  $J$  = 7.5, 1.8, 0.9, 1H), 6.87 (d,  $J$  = 7.8 Hz, 1H), 2.47 (s, 3H).  $^{13}\text{C}$  NMR (100 MHz,  $\text{CDCl}_3$ ):  $\delta$  = 159.2, 149.4, 139.3, 139.0, 137.6, 137.5, 135.2, 133.4, 132.0, 131.1, 130.8, 129.3, 128.3, 128.1, 127.5, 127.2, 125.9, 125.7, 125.4, 121.3, 21.1. HRMS:  $m/z$ :  $[\text{M} + \text{H}]^+$  calculated for  $\text{C}_{22}\text{H}_{18}\text{N}$ : 296.14338; found: 296.14333.

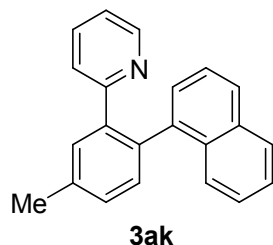

**2-(5-methyl-2-(naphthalen-1-yl)phenyl)pyridine (3ak).** Yellow oil (44.7 mg, 76%).  $^1\text{H}$  NMR (300 MHz,  $\text{CDCl}_3$ ):  $\delta$  = 8.53 (d,  $J$  = 4.8 Hz, 1H), 7.78 (d,  $J$  = 7.8 Hz, 1H), 7.74 (d,  $J$  = 8.1 Hz, 1H), 7.70-7.67 (m, 2H), 7.39-7.24 (m, 6H), 7.03 (td,  $J$  = 7.5, 1.8 Hz, 1H), 6.87 (ddd,  $J$  = 7.5, 5.1, 1.2 Hz, 1H), 6.65 (d,  $J$  = 7.8 Hz, 1H), 2.51 (s, 3H).  $^{13}\text{C}$  NMR (100 MHz,  $\text{CDCl}_3$ ):  $\delta$  = 158.7, 149.2, 140.4, 139.3, 137.7, 135.9, 134.8, 133.5, 132.1, 131.5, 130.8, 129.0, 128.0, 127.9, 127.3, 126.2, 125.8, 125.5, 125.1, 124.2, 121.1, 21.2. HRMS:  $m/z$ :  $[\text{M} + \text{H}]^+$  calculated for  $\text{C}_{22}\text{H}_{18}\text{N}$ : 296.14338; found: 296.14318

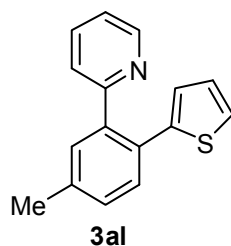

**2-(5-methyl-2-(thiophen-2-yl)phenyl)pyridine (3al).** Yellow solid (43.2 mg, 86%).  $^1\text{H}$  NMR (300 MHz,  $\text{CDCl}_3$ ):  $\delta$  = 8.65 (d,  $J$  = 4.8 Hz, 1H), 7.50-7.41 (m, 3H), 7.25-7.07 (m, 4H), 6.85 (dd,  $J$  = 3.6, 5.1 Hz, 1H), 6.65 (d,  $J$  = 2.7 Hz, 1H), 2.41 (s, 3H).  $^{13}\text{C}$  NMR (100 MHz,  $\text{CDCl}_3$ ): 159.3, 149.3, 142.9, 139.6, 137.9, 135.4, 131.1, 130.6, 130.2, 129.2, 127.0, 126.7, 125.3, 124.9, 121.6, 21.0. HRMS:  $m/z$ :  $[\text{M} + \text{H}]^+$  calculated for  $\text{C}_{16}\text{H}_{14}\text{NS}$ : 252.08415; found: 252.08401.

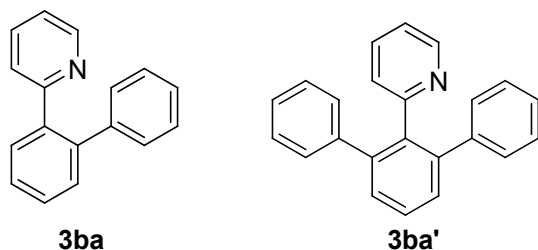

**2-(biphenyl-2-yl)pyridine (3ba).** White solid (36.0 mg, 68% , **3ba** : **3ba'** = 8.3 : 1 by  $^1\text{H}$  NMR).  $^1\text{H}$  NMR (300 MHz,  $\text{CDCl}_3$ ):  $\delta$  = 8.63 (d,  $J$  = 4.2 Hz, 1H), 7.71-6.68 (m, 1H), 7.48-7.43 (m, 3H), 7.37 (td,  $J$  = 7.8, 1.8 Hz, 1H), 7.24-7.21 (m, 3H), 7.17-7.14 (m, 2H), 9.09 (dd,  $J$  = 6.6, 5.1 Hz, 1H), 6.88 (d,  $J$  = 8.1, 1H).  $^{13}\text{C}$  NMR (100 MHz,  $\text{CDCl}_3$ ):  $\delta$  = 159.3, 149.4, 141.4, 140.7, 139.5, 135.1, 130.5(2C), 129.7, 128.5, 128.0, 127.6, 126.7, 125.4, 121.3. HRMS:  $m/z$ :  $[\text{M} + \text{H}]^+$  calculated for **3ba'**  $\text{C}_{23}\text{H}_{18}\text{N}$ : 308.14338; found: 308.14339.

For the reaction between **1g** and **2a**: 67.5 mg **1g** was used (47.5 mg, 88%, **3ba** : **3ba'** = 8.3 : 1 by  $^1\text{H}$  NMR).

For the reaction between **1h** and **2a**: 37.9 mg **1h** was used. (7.6 mg, 16%, trace **3ba'** was observed).

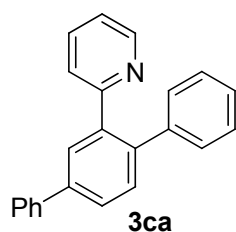

**2-(4-phenylbiphenyl-2-yl)pyridine (3ca).** White solid (52.4 mg, 85%).  $^1\text{H}$  NMR (300 MHz,  $\text{CDCl}_3$ ):  $\delta$  = 8.66 (ddd,  $J$  = 5.1, 1.8, 1.2 Hz, 1H), 7.94 (d,  $J$  = 2.1 Hz, 1H), 7.72-7.69 (m, 3H), 7.52 (d,  $J$  = 7.8 Hz, 1H), 7.48-7.42 (m, 2H), 7.40-7.32 (m, 2H), 7.26-7.18 (m, 5H), 7.12 (ddd,  $J$  = 7.5, 4.8, 1.6 Hz, 1H), 6.94 (dt,  $J$  = 7.8, 0.9 Hz, 1H).  $^{13}\text{C}$  NMR (100 MHz,  $\text{CDCl}_3$ ):  $\delta$  = 159.2, 149.4, 141.0, 140.5, 140.4, 139.8, 139.6, 135.2, 131.0, 129.6, 129.3, 128.7, 128.0, 127.4, 127.1, 127.0, 126.7, 125.4, 121.4. HRMS:  $m/z$ :  $[\text{M} + \text{H}]^+$  calculated for  $\text{C}_{23}\text{H}_{18}\text{N}$ : 308.14338; found 308.14304.

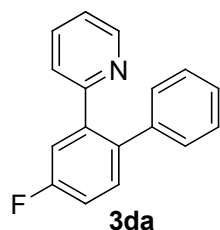

**2-(4-fluorobiphenyl-2-yl)pyridine (3da).** White solid (28.3, mg 57%).  $^1\text{H}$  NMR (300 MHz,  $\text{CDCl}_3$ ):  $\delta$  = 8.64 (ddd,  $J$  = 4.8, 1.8, 0.9 Hz, 1H), 7.46-7.36 (m, 3H), 7.26-7.18 (m, 4H), 7.17-7.10 (m, 4H), 6.86 (d,  $J$  = 7.8 Hz, 1H).  $^{13}\text{C}$  NMR (100 MHz,  $\text{CDCl}_3$ ):  $\delta$  = 162.3 (d,  $J$  = 245.4 Hz), 158.0, 149.5, 141.3 (d,  $J$  = 7.6 Hz), 140.5, 136.7 (d,  $J$  = 3.2 Hz), 135.3, 132.1 (d,  $J$  = 7.9 Hz), 129.7, 128.1, 126.8, 125.3, 121.8, 117.2 (d,  $J$  = 22.3 Hz), 115.4 (d,  $J$  = 21.1 Hz).

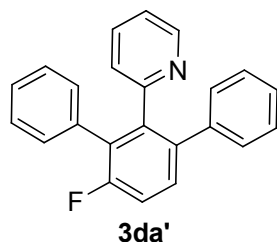

**2-(3-phenyl-4-fluorobiphenyl-2-yl)pyridine (3da')**. White solid (7.4 mg, 11%).  $^1\text{H}$  NMR (400 MHz,  $\text{CDCl}_3$ ):  $\delta$  = 8.27 (d,  $J$  = 6.4 Hz, 1H), 7.42 (dd,  $J$  = 5.2, 8.4 Hz, 1H), 7.29-7.25 (m, 2H), 7.19-7.10 (m, 8H), 7.08-7.06 (m, 2H), 6.89-6.86 (m, 1H), 6.83 (d,  $J$  = 7.6 Hz, 1H).  $^{13}\text{C}$  NMR (100 MHz,  $\text{CDCl}_3$ ):  $\delta$  = 159.2 (d,  $J$  = 244.6 Hz), 157.7 (d,  $J$  = 2.6 Hz), 148.5, 140.9 (d,  $J$  = 2.7 Hz), 140.8, 137.7 (d,  $J$  = 3.6 Hz), 134.9, 134.2, 130.7, 130.5, 129.6, 129.2 (d,  $J$  = 16.1), 127.7, 127.5, 126.9, 126.5, 126.4, 121.1, 115.4 (d,  $J$  = 23.1 Hz).  $^1\text{H}$  RMS:  $m/z$ :  $[\text{M} + \text{H}]^+$  calculated for  $\text{C}_{23}\text{H}_{17}\text{FN}$ : 326.13395; found: 326.13398.

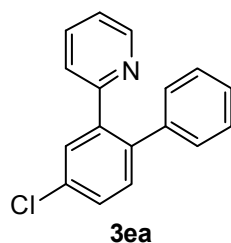

**2-(4-chlorobiphenyl-2-yl)pyridine (3ea)**. White solid (25.2 mg, 47%).  $^1\text{H}$  NMR (300 MHz,  $\text{CDCl}_3$ ):  $\delta$  = 8.63 (d,  $J$  = 4.2 Hz, 1H), 7.80 (d,  $J$  = 7.8 Hz, 1H), 7.67-7.59 (m, 3H), 7.57-7.49 (m, 4H), 7.39 (td,  $J$  = 7.8, 1.8 Hz, 1H), 7.28-7.10 (m, 5H), 7.11 (ddd,  $J$  = 7.5, 5.1, 1.2 Hz, 1H), 6.90 (d,  $J$  = 7.8 Hz, 1H).  $^{13}\text{C}$  NMR (100 MHz,  $\text{CDCl}_3$ ):  $\delta$  = 157.9, 149.5, 140.9, 140.2, 139.0, 135.3, 133.6, 131.8, 130.4, 129.5, 128.5, 128.2, 127.0, 125.2, 121.8. HRMS:  $m/z$ :  $[\text{M} + \text{H}]^+$  calculated for  $\text{C}_{17}\text{H}_{12}\text{ClN}$ : 266.07310; found: 266.07289.

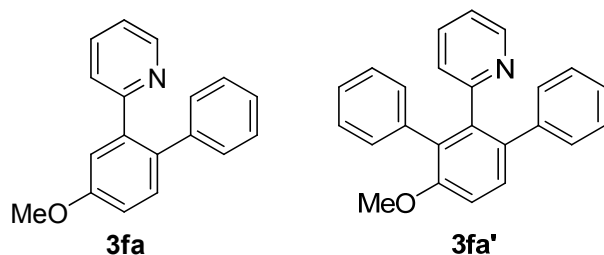

**2-(4-methoxybiphenyl-2-yl)pyridine (3fa)**. 49.4 mg (0.17 mmol) **11** was used. White solid (44.6 mg, 61%, **3fa** : **3fa'** = 2 : 1).  $^1\text{H}$  NMR (300 MHz,  $\text{CDCl}_3$ ):  $\delta$  = 8.63 (d,  $J$  = 4.5, 1H), 7.37-7.33 (m, 2H), 7.25-7.17 (m, 4H), 7.12-7.08 (m, 3H), 6.86 (d,  $J$  = 7.8 Hz, 1H), 3.89 (s, 3H).  $^{13}\text{C}$  NMR (100 MHz,  $\text{CDCl}_3$ ): 159.1 (2C), 149.4, 141.1, 140.5, 135.2, 133.3, 131.7, 129.8, 128.0, 126.3, 125.4, 121.4, 115.0 (2C), 55.5. HRMS:  $m/z$ :  $[\text{M} + \text{H}]^+$  calculated for  $\text{C}_{18}\text{H}_{16}\text{NO}$ : 262.12264; found: 262.12238. and **3fa'**:  $[\text{M} + \text{H}]^+$  calculated for  $\text{C}_{24}\text{H}_{20}\text{NO}$ : 338.15394; found: 338.15374.

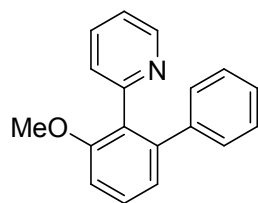

**3ga**

**2-(3-methoxybiphenyl-2-yl)pyridine (3ga).** 67.5 mg(0.23 mmol) **1m** was used. White solid. (37.9 mg, 63%).  $^1\text{H NMR}$  (300 MHz,  $\text{CDCl}_3$ ):  $\delta$  = 8.57 (d,  $J$  = 4.8 Hz, 1H), 7.50-7.39 (m, 2H), 7.14-6.99 (m, 9H), 3.78 (s, 3H).  $^{13}\text{C NMR}$  (100 MHz,  $\text{CDCl}_3$ ):  $\delta$  = 157.2, 156.8, 148.7, 142.7, 141.0, 135.3, 129.5, 129.1, 127.5, 126.3, 126.2, 122.4, 121.2, 110.0, 55.9.

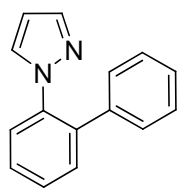

**3ha**

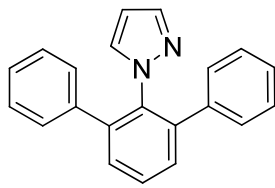

**3ha'**

**1-(biphenyl-2-yl)-1H-pyrazole (3ha).** White solid (23.8 mg, 46%, **3ha** : **3ha'** = 8.3 : 1).  $^1\text{H NMR}$  (300 MHz,  $\text{CDCl}_3$ ):  $\delta$  = 7.63-7.60 (m, 2H), 7.48-7.46 (m, 3H), 7.29-7.25 (m, 3H), 7.12-7.09 (m, 2H), 7.07 (dd,  $J$  = 2.4, 0.6 Hz, 1H), 6.18 (dd,  $J$  = 2.4, 2.1 Hz).  $^{13}\text{C NMR}$  (100 MHz,  $\text{CDCl}_3$ ): 140.2, 138.6, 136.7, 131.2, 131.0, 128.5, 128.4, 128.3, 128.2, 127.4, 126.5, 106.3. HRMS:  $m/z$ :  $[\text{M} + \text{H}]^+$  calculated for **3ha'**:  $[\text{M} + \text{H}]^+$  calculated for  $\text{C}_{21}\text{H}_{17}\text{N}_2$ : 297.13862; found: 297.13844.

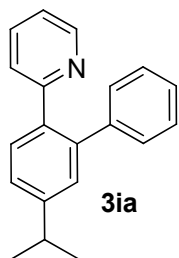

**3ia**

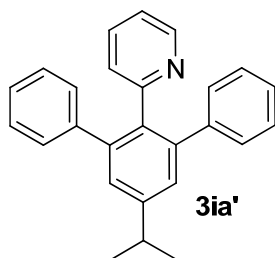

**3ia'**

**2-(5-isopropylbiphenyl-2-yl)pyridine (3ia).** 58.4 mg(0.19 mmol) **1p** was used. White solid (25.4 mg, 41%, **3ia** : **3ia'** = 9.1 : 1).  $^1\text{H NMR}$  (300 MHz,  $\text{CDCl}_3$ ):  $\delta$  = 8.61 (d,  $J$  = 4.8Hz, 1H), 7.63 (d,  $J$  = 7.8, 1H), 7.39-7.32 (m, 2H), 7.28 (d,  $J$  = 1.8, 1H), 7.25-7.21 (m, 3H), 7.19-7.15 (m, 2H), 7.07 (ddd,  $J$  = 7.5, 5.1, 1.2Hz, 1H), 6.86 (d,  $J$  = 7.8Hz, 1H), 3.0(m, 1H), 1.33(s, 3H), 1.31(s, 3H).  $^{13}\text{C NMR}$  (100 MHz,  $\text{CDCl}_3$ ):  $\delta$  = 159.3, 149.3 (2C), 141.7, 140.5, 137.1, 135.0, 130.5, 129.7, 128.6, 128.0, 126.5, 125.7, 125.3, 121.0, 33.9, 23.9. HRMS:  $m/z$ :  $[\text{M} + \text{H}]^+$  calculated for  $\text{C}_{20}\text{H}_{20}\text{N}$ : 274.15903; found 274.15872. and **3ia'**  $[\text{M} + \text{H}]^+$  calculated for  $\text{C}_{26}\text{H}_{24}\text{N}$ : 350.19033; found: 350.19009.



## References:

- [1] Li, Y.; Li, B.-J.; Wang, W.-H.; Huang, W.-P.; Zhang, X.-S.; Chen, K.; Shi, Z.-J. *Angew. Chem., Int. Ed.* **2011**, *50*, 2115.
- [2] Manoso, A. S.; Ahn, C.-J.; Soheili, A.; Handy, C. J.; Correia, R.; Seganish, W. M.; Deshong, P. *J. Org. Chem.* **2004**, *69*, 8305.
- [3] Li, H.; Li, Y.; Zhang, X.-S.; Chen, K.; Wang, X.; Shi, Z.-J. *J. Am. Chem. Soc.* **2011**, *133*, 15244.
- [4] Yu, W. Y.; Sit, W. N.; Lai, K. M.; Zhou, Z.; Chan, A. S. C. *J. Am. Chem. Soc.* **2008**, *130*, 3304.
- [5] Tang, P.-P.; Ritter, T. *Tetrahedron*, **2011**, *67*, 4449.
- [6] Lee, S.-Y. A.; Chang, Y.-T.; Chu, S.-F.; Tsao, G.-W. *Tetrahedron Lett.* **2006**, *47*, 7085.
- [7] Tang, Z.-Y.; Zhang, Y.; Wang, T.; Wang, W. *Synlett*, **2010**, *5*, 804.
- [8] Murata, M.; Suzuki, K.; Watanabe, S.; Masuda, Y. *J. Org. Chem.* **1997**, *63*, 8569.

## NMR Spectra of Alcohol Substrates 1

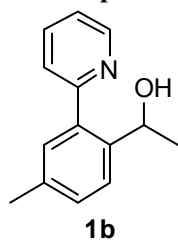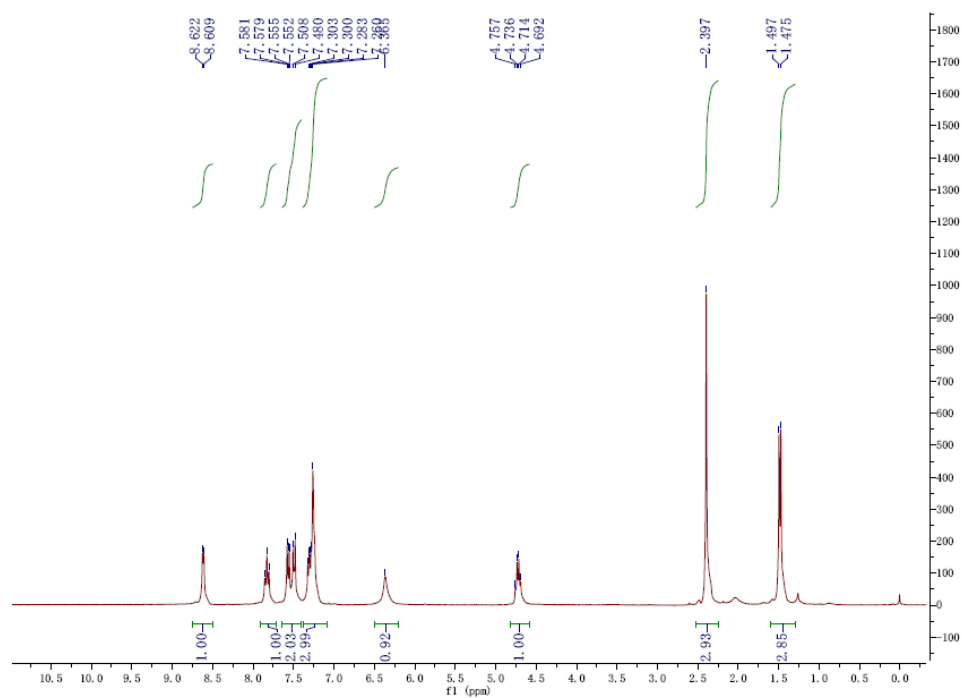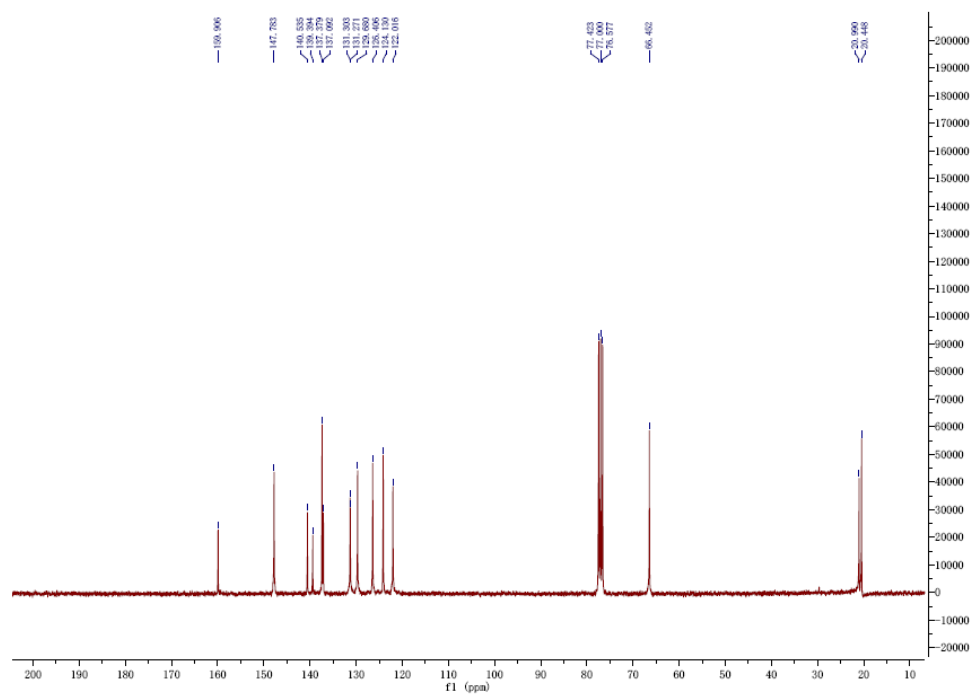

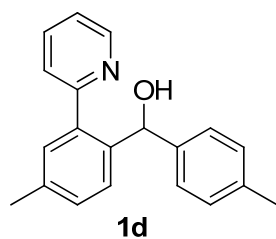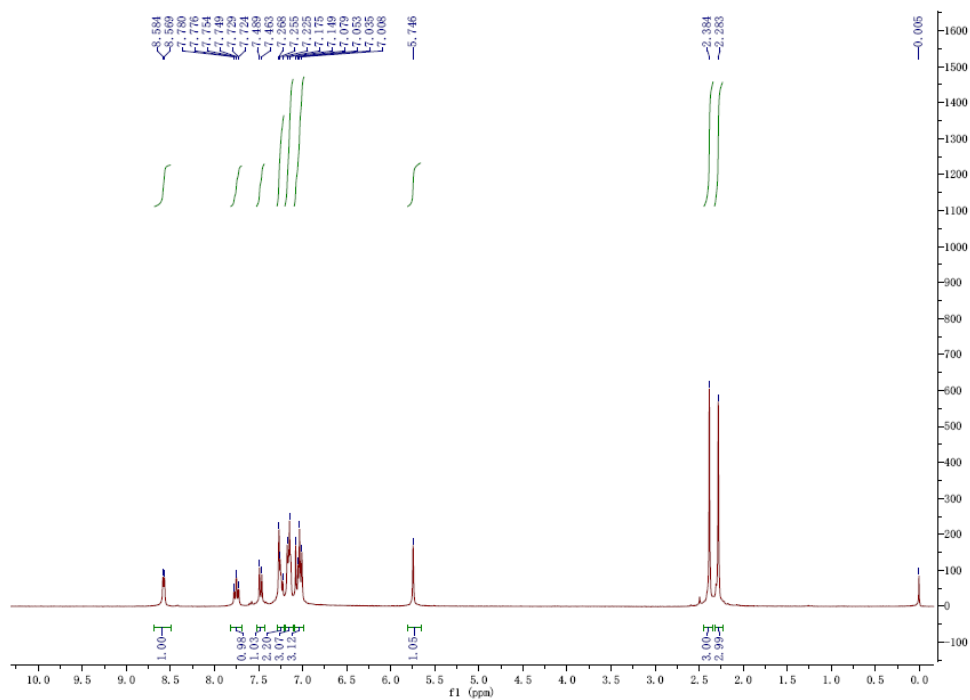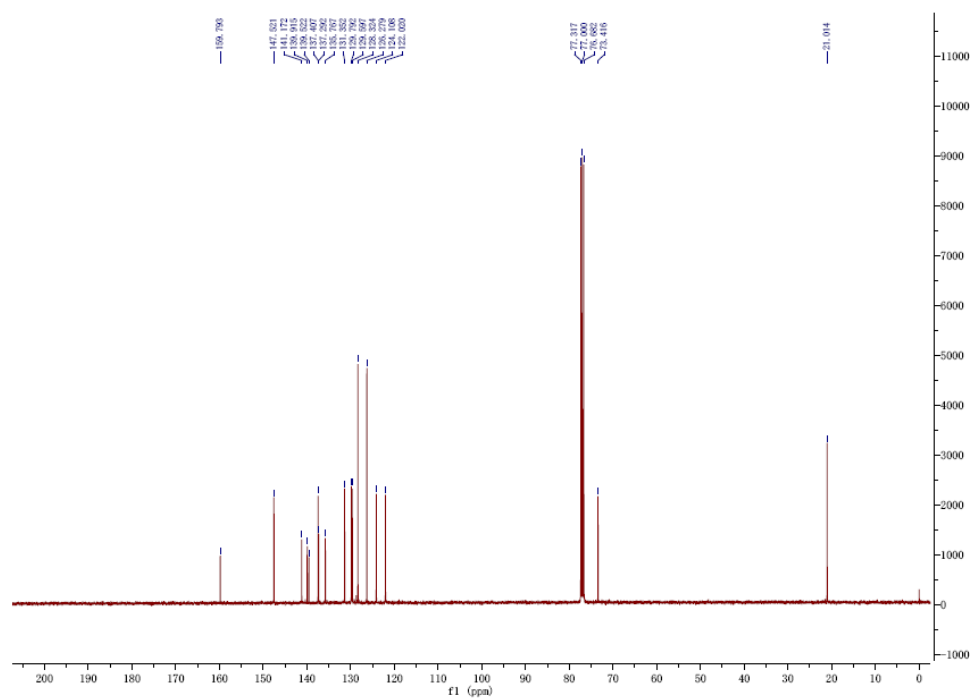

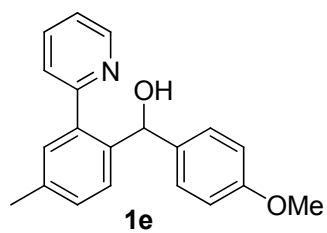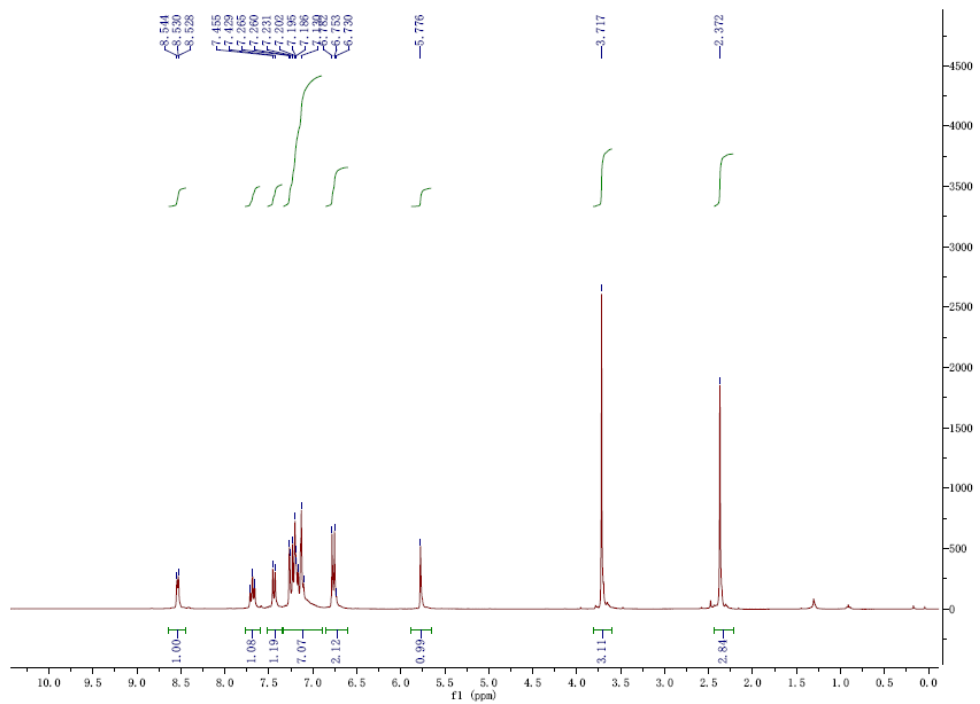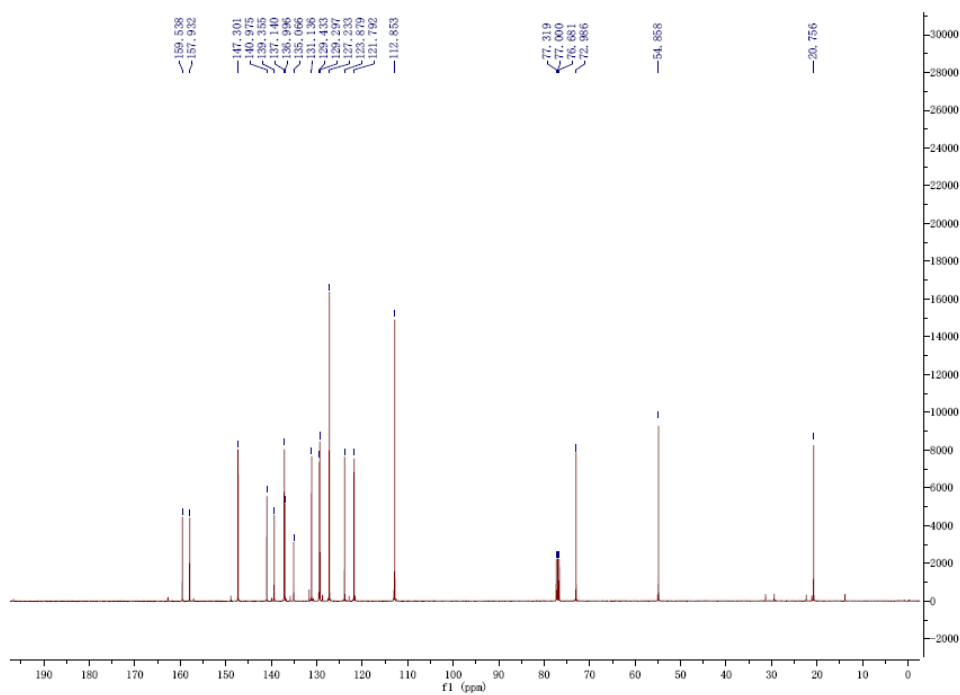

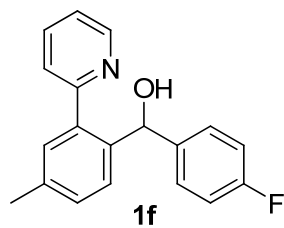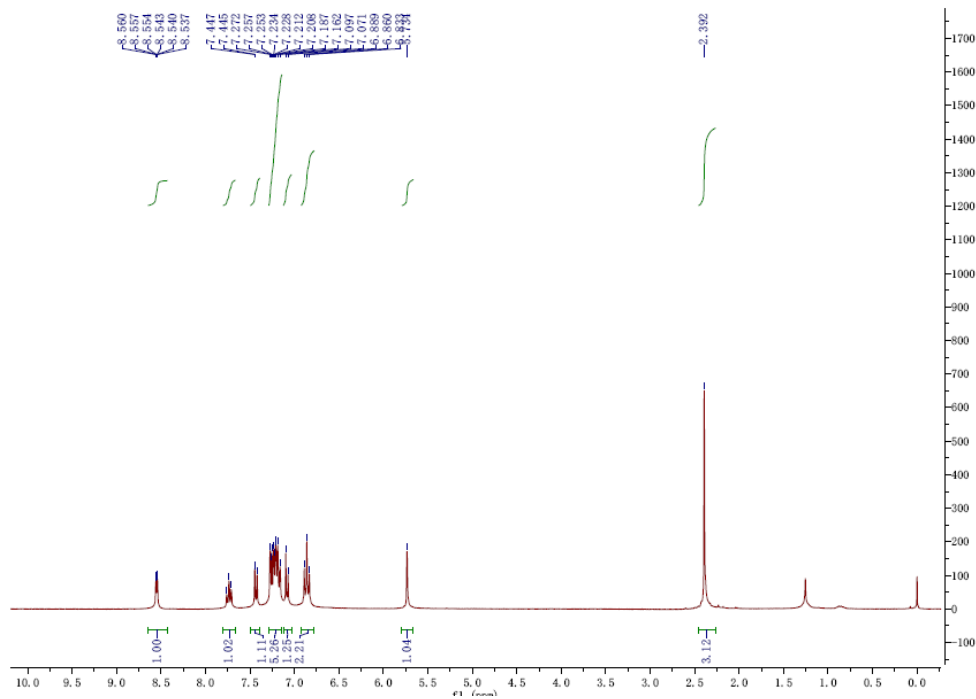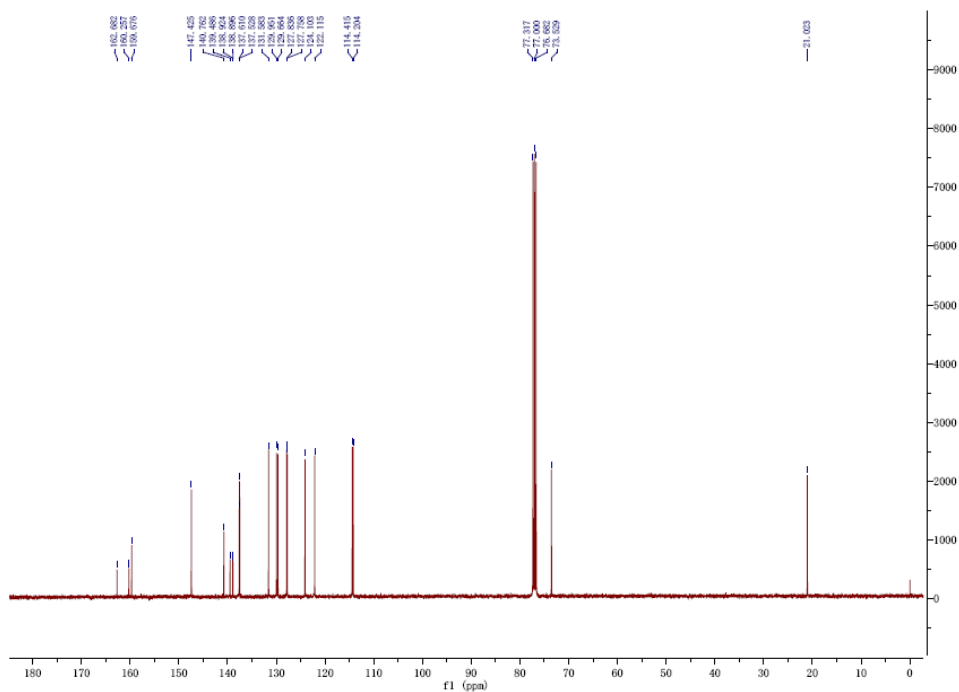

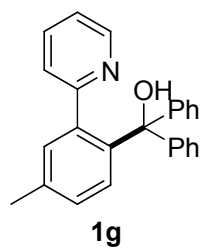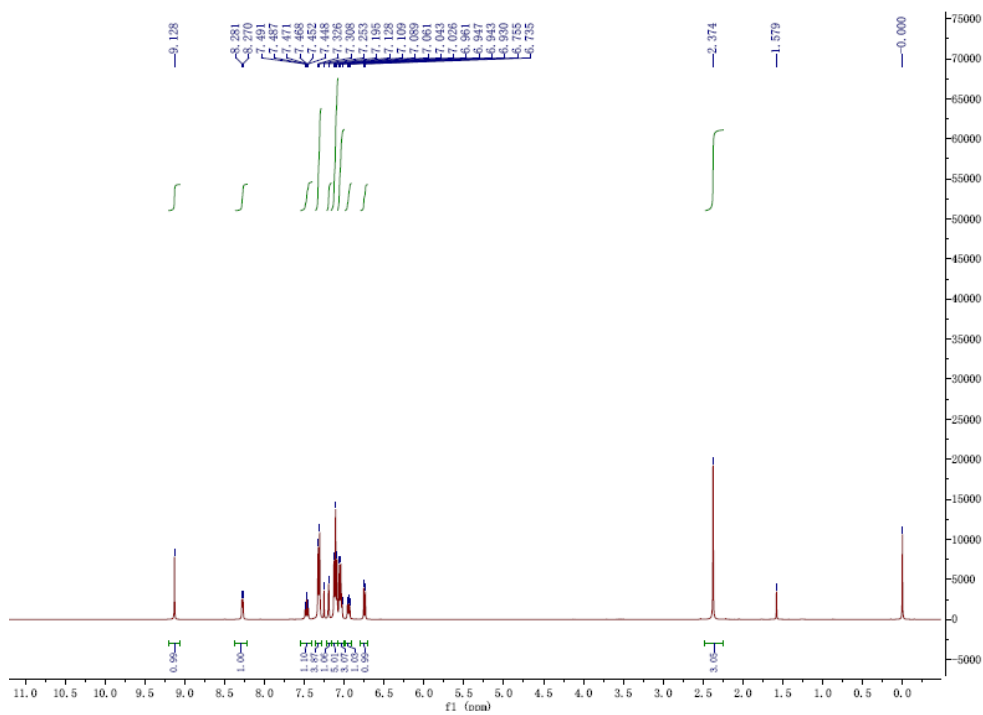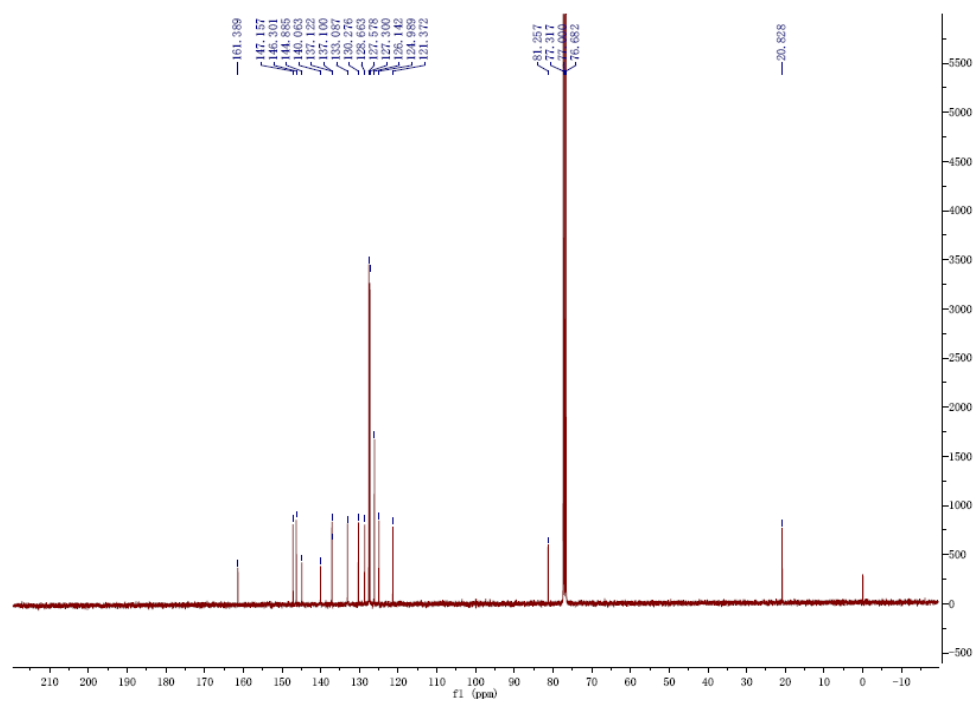

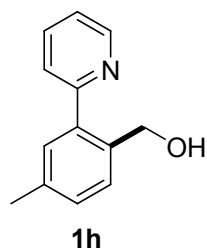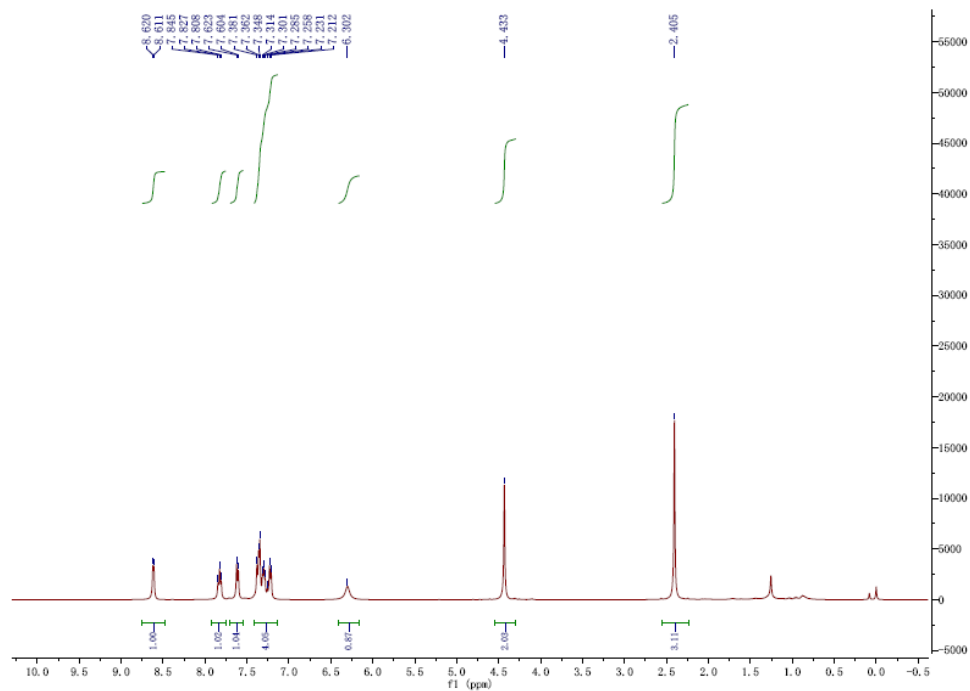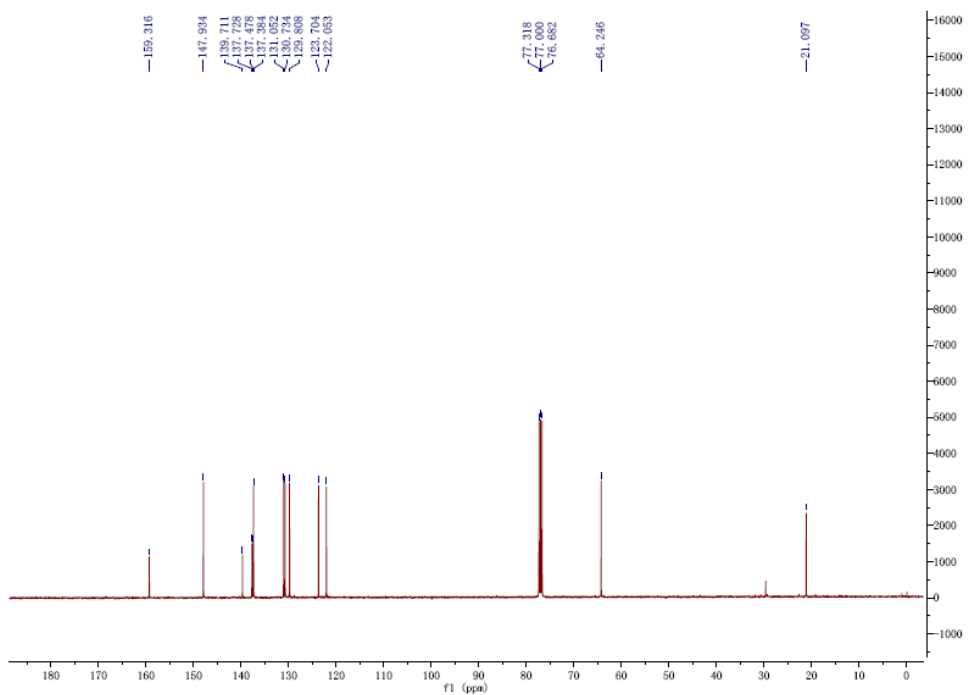

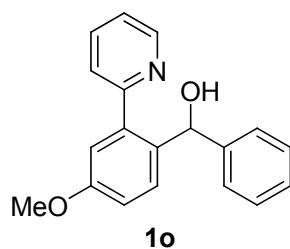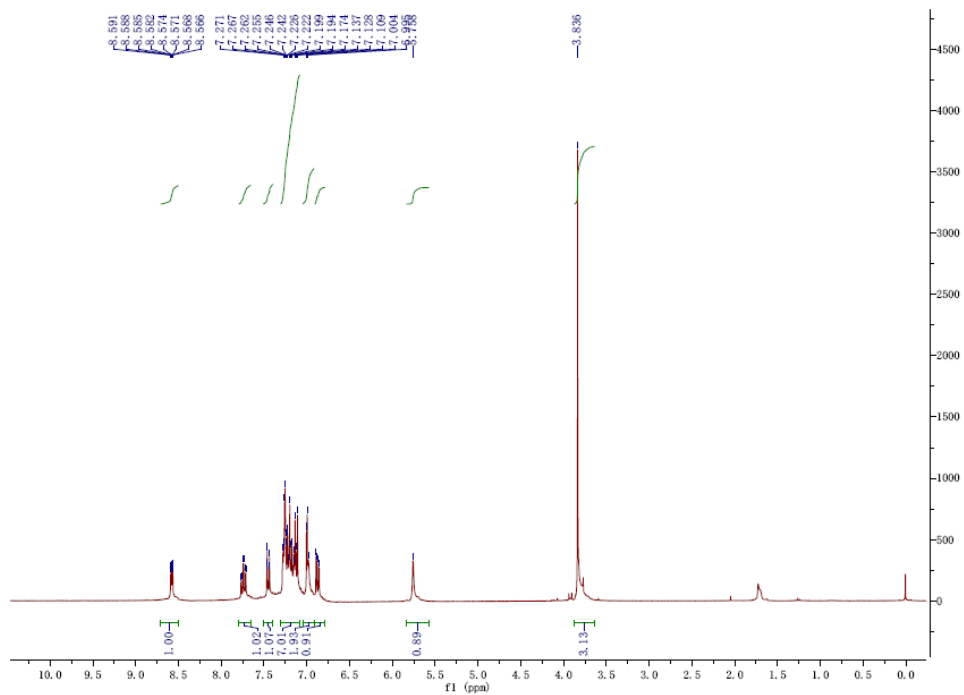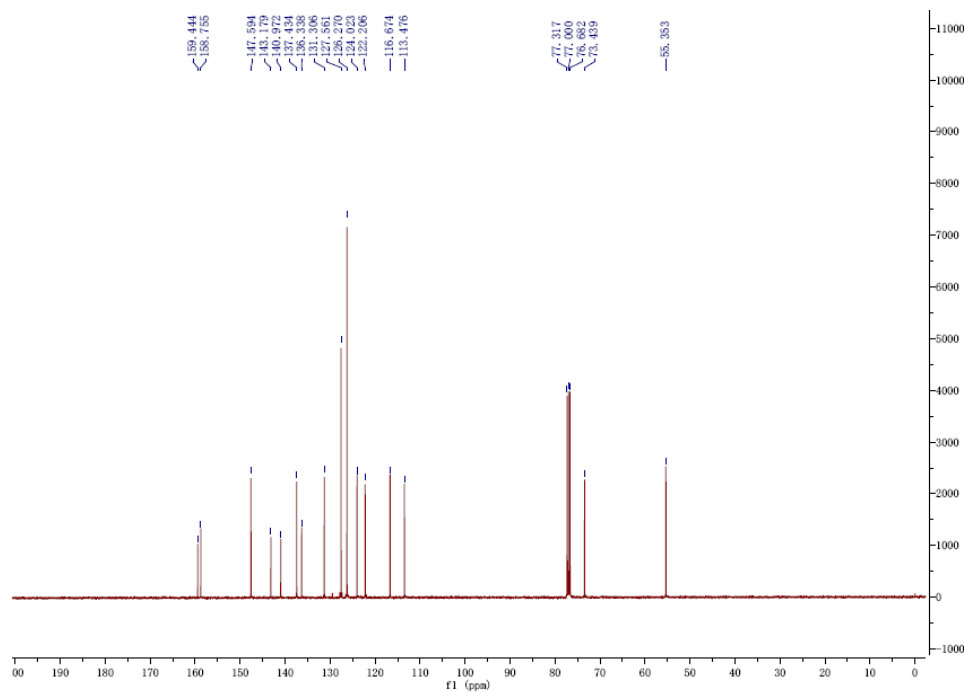



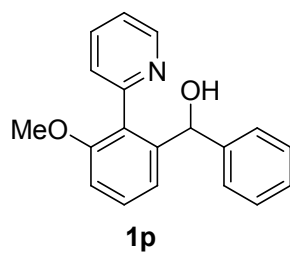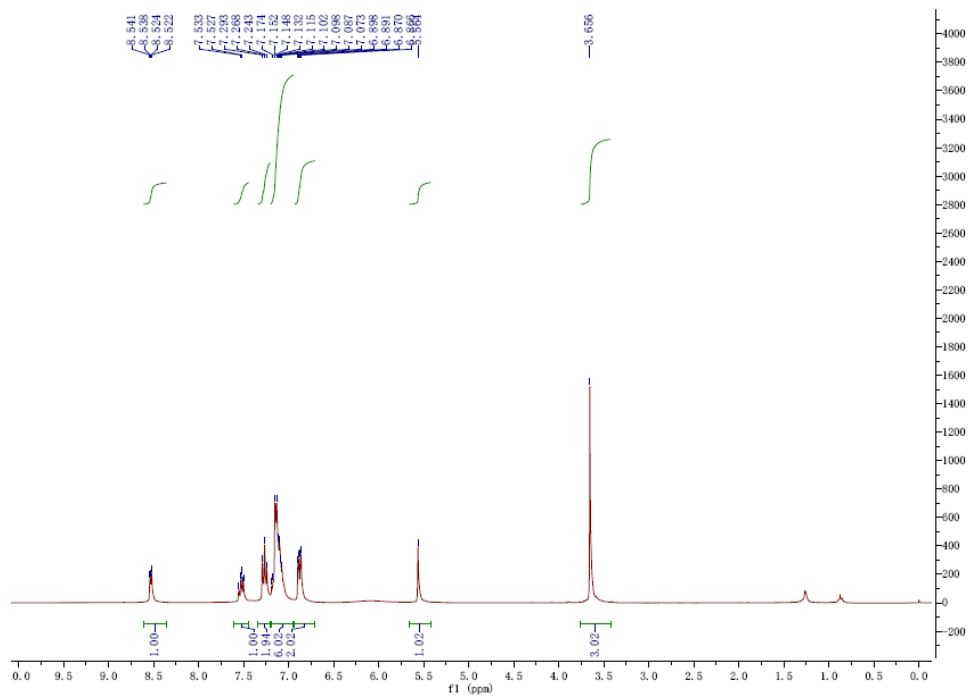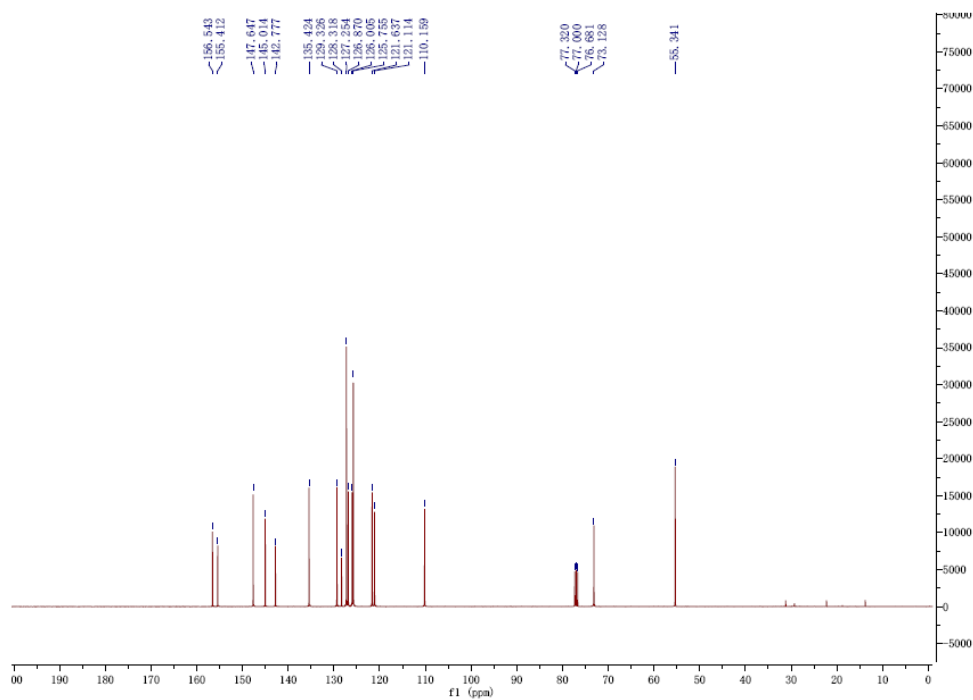



### NMR Spectra of Product 3

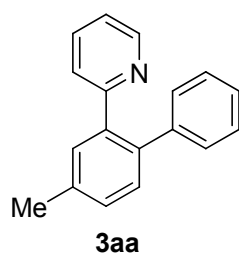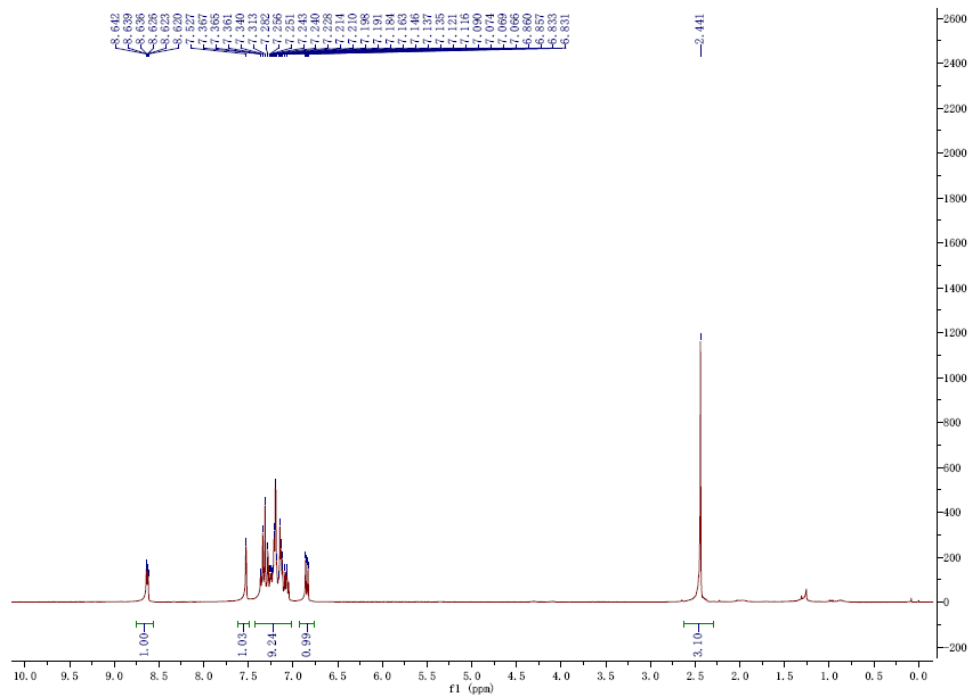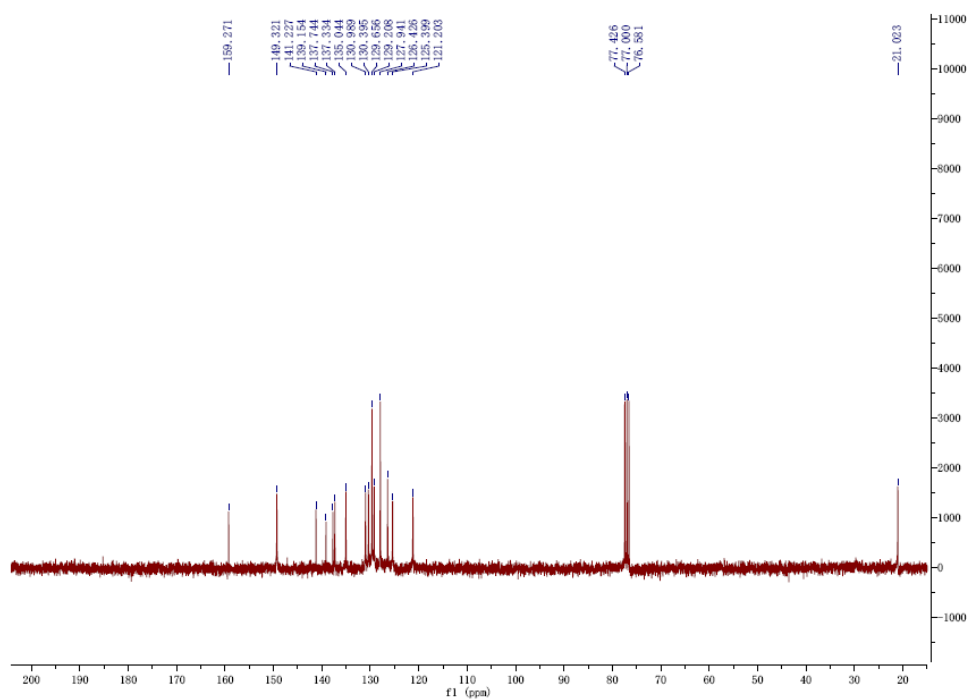

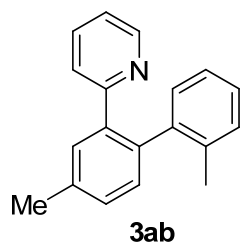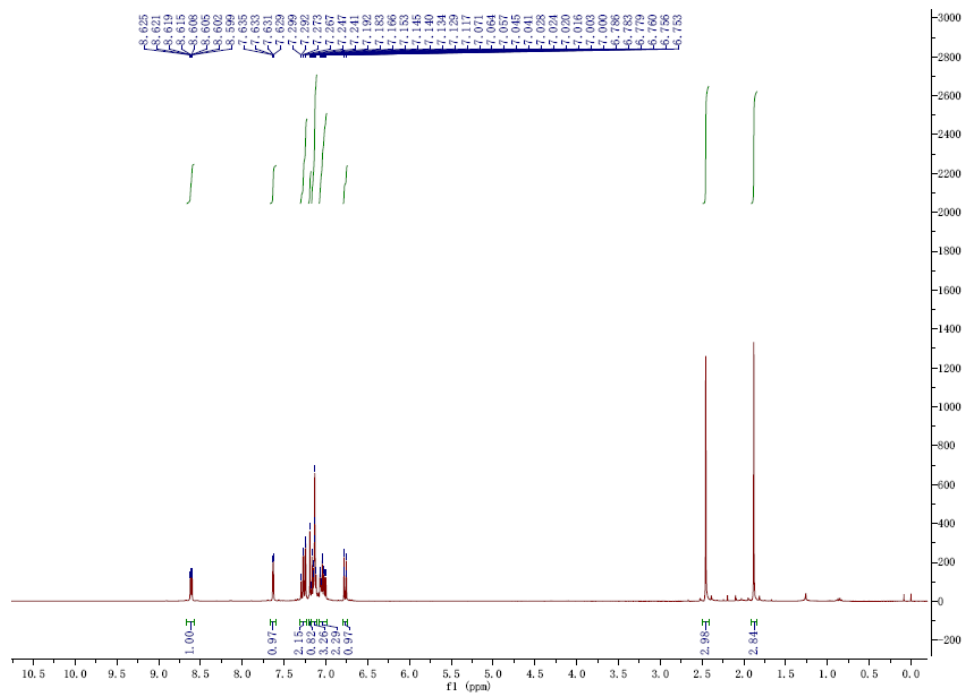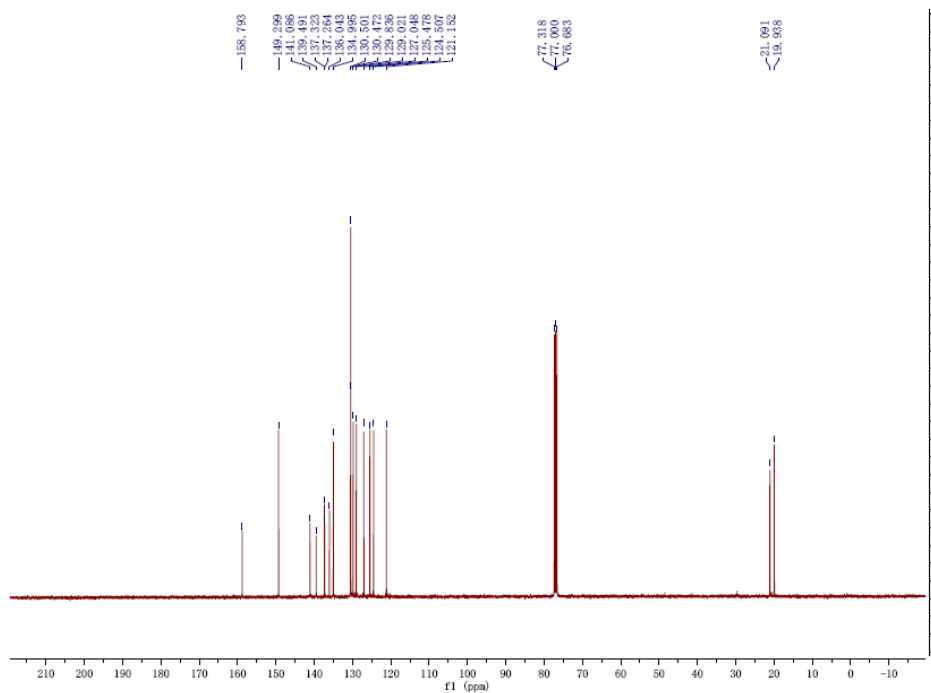

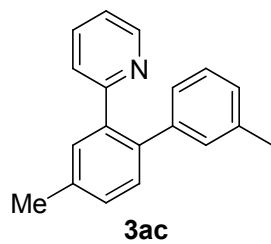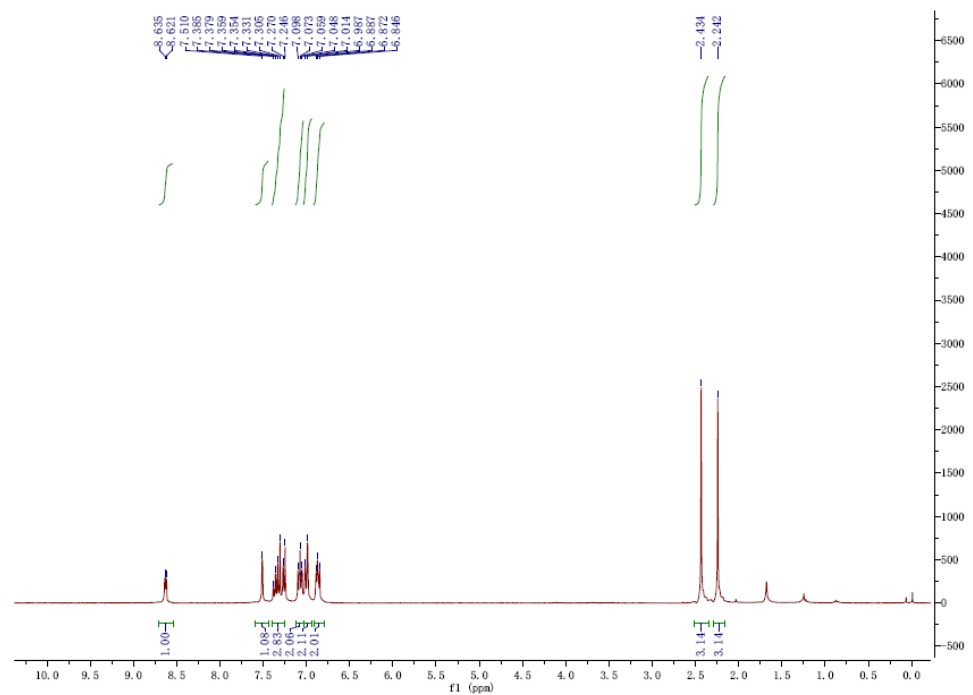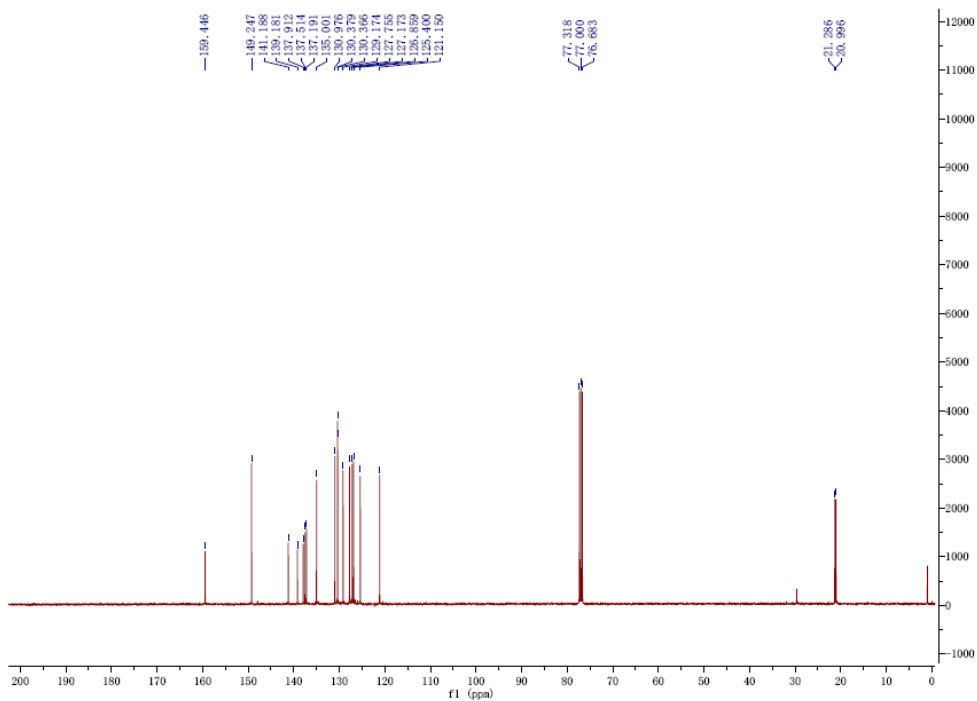

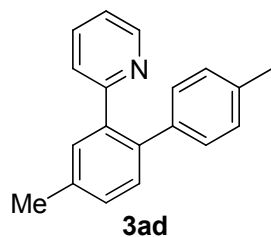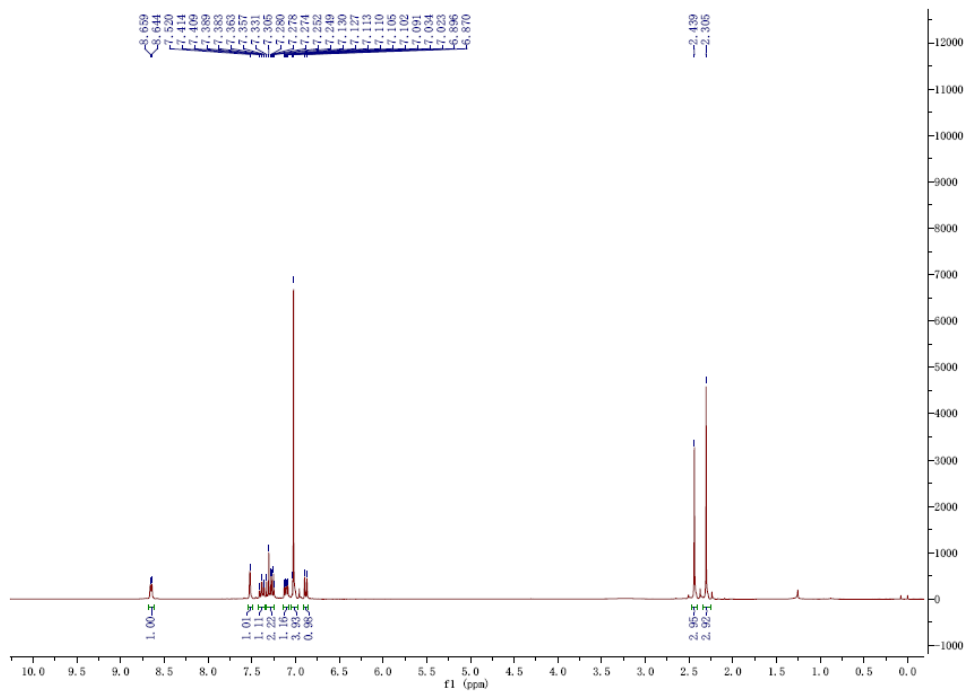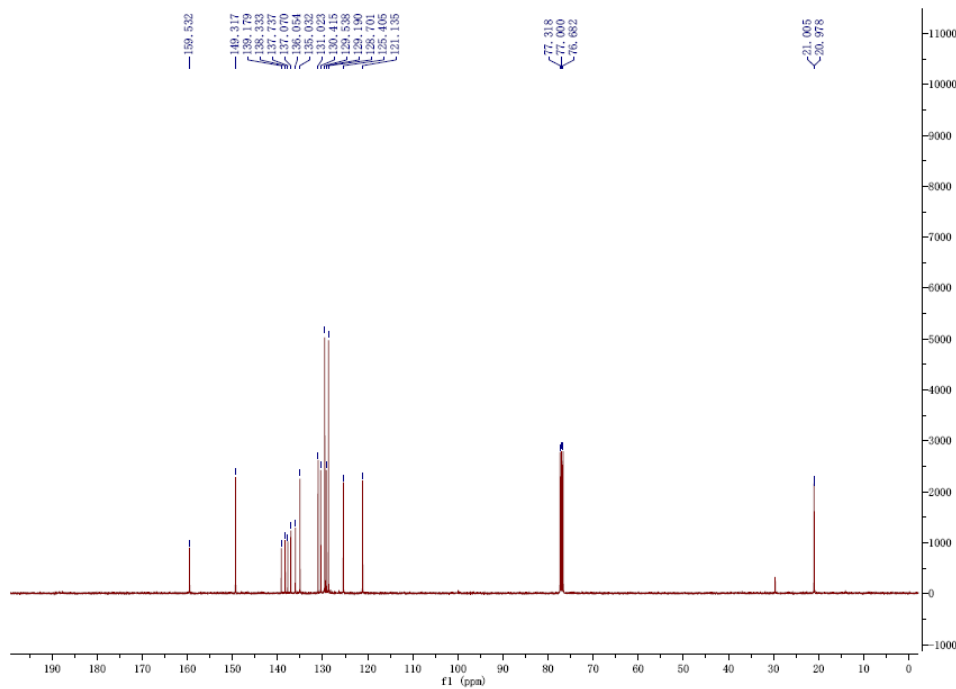

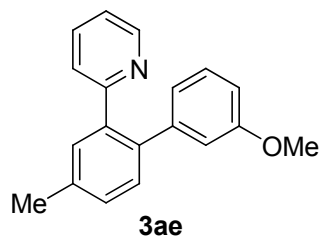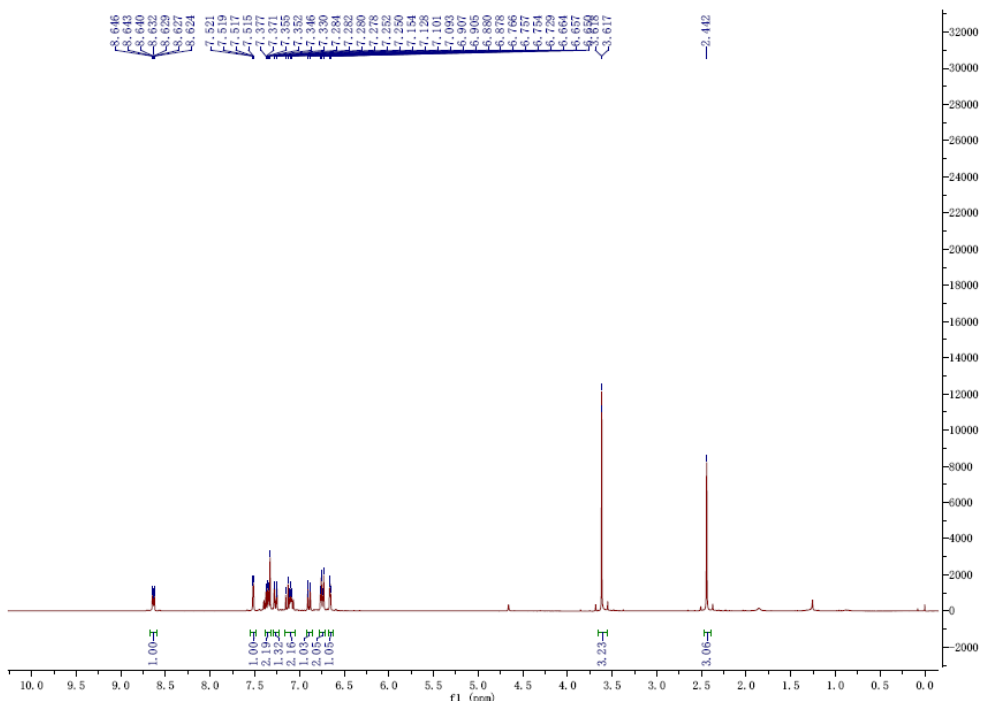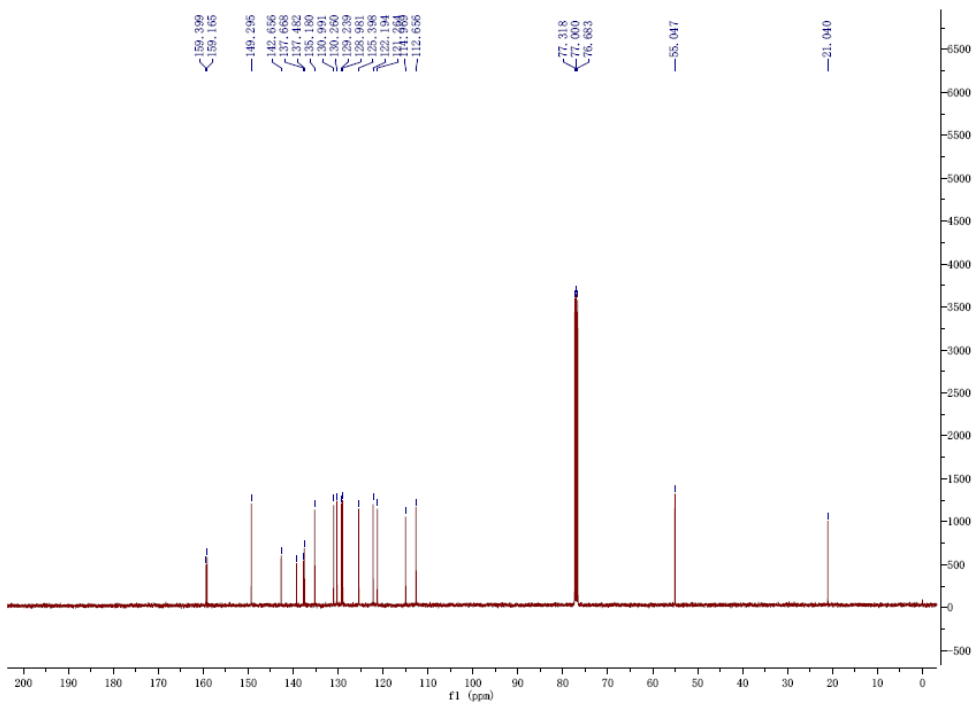

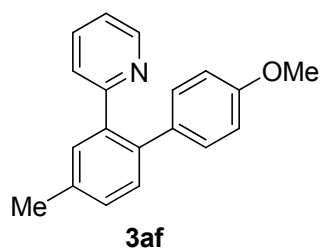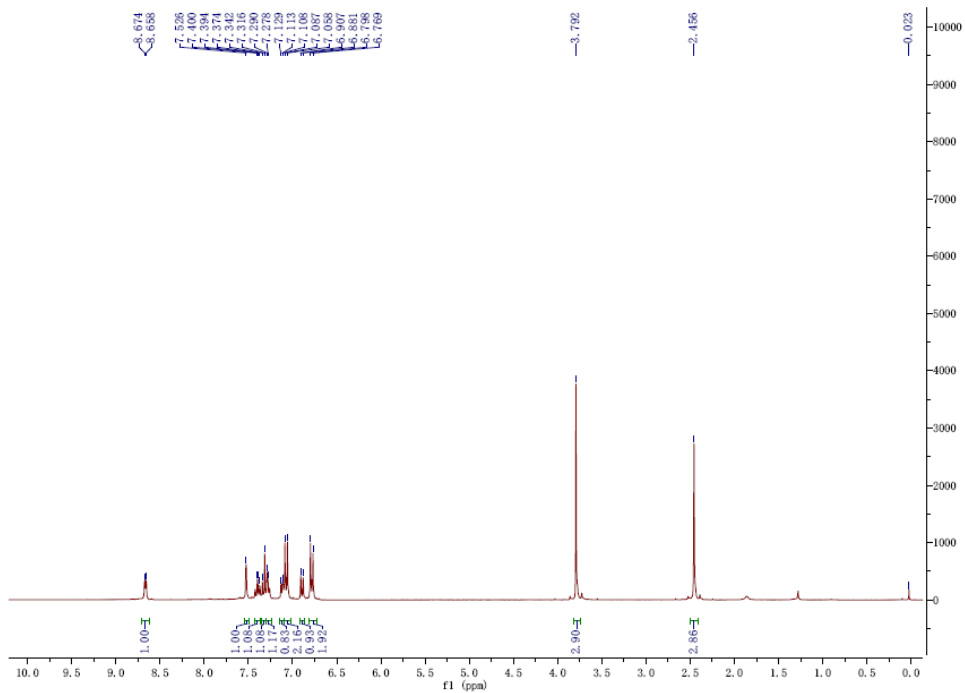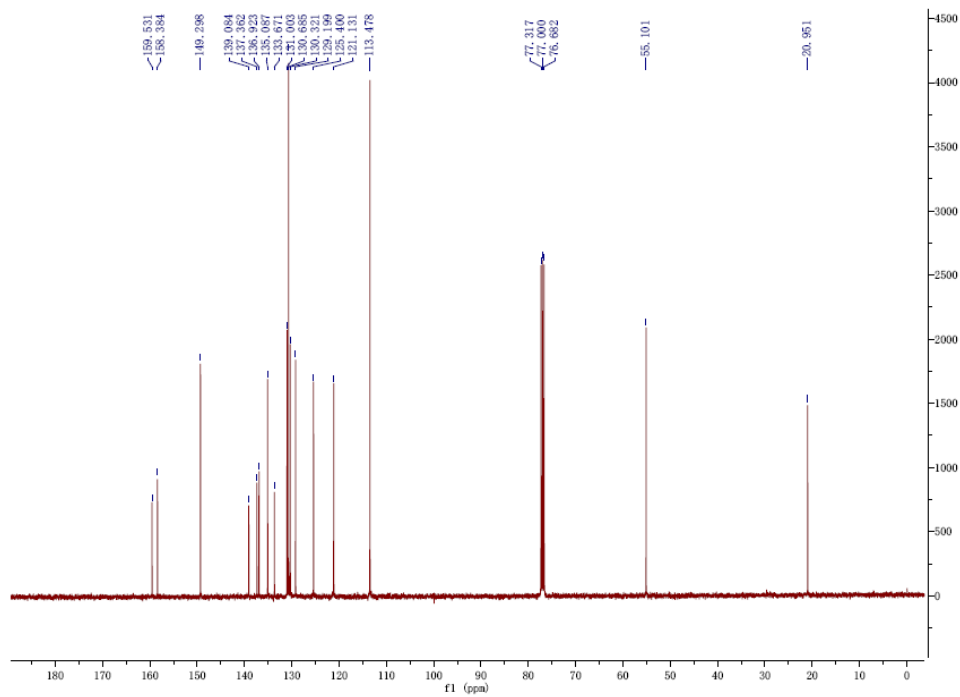



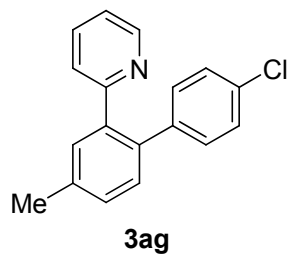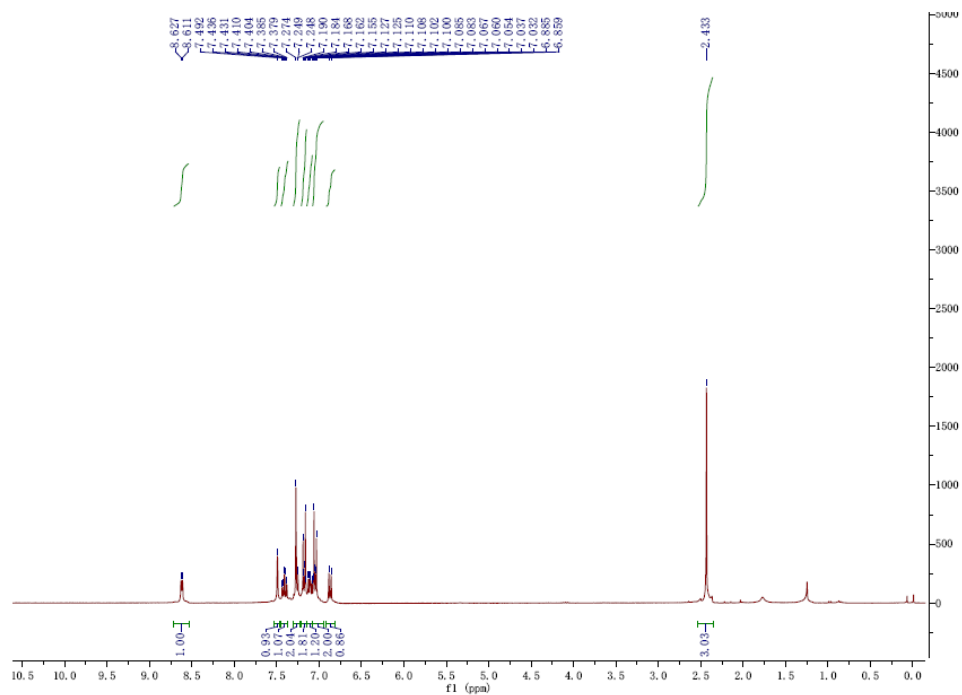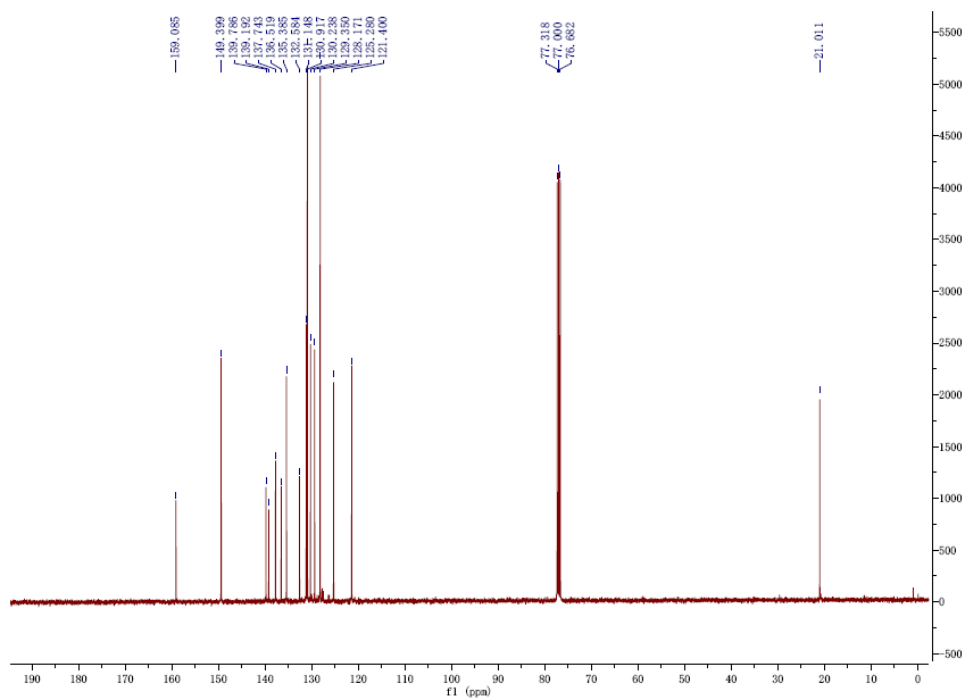

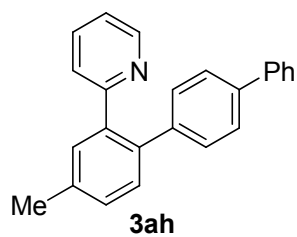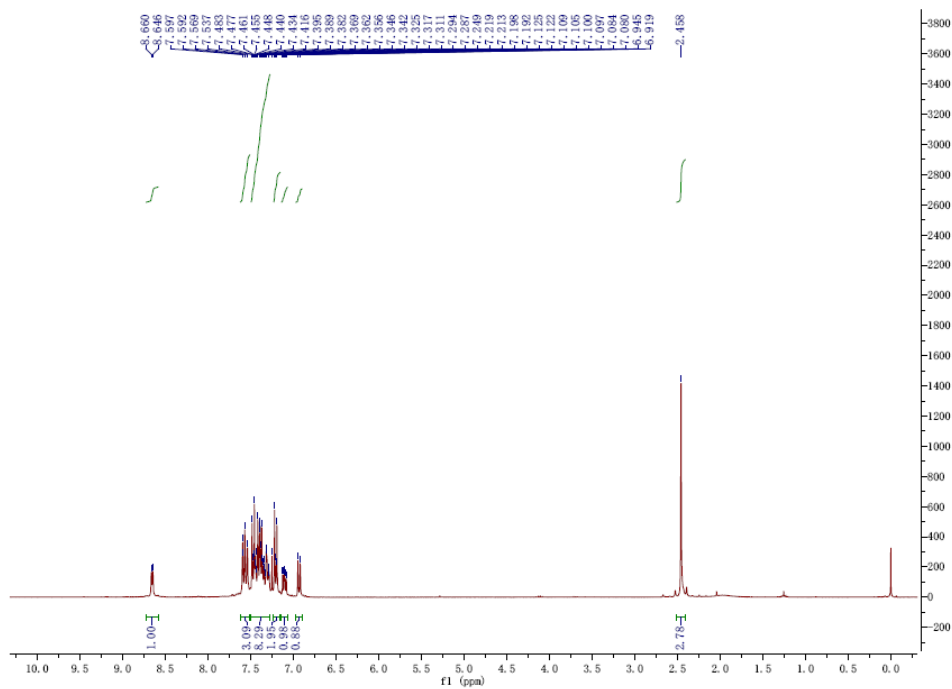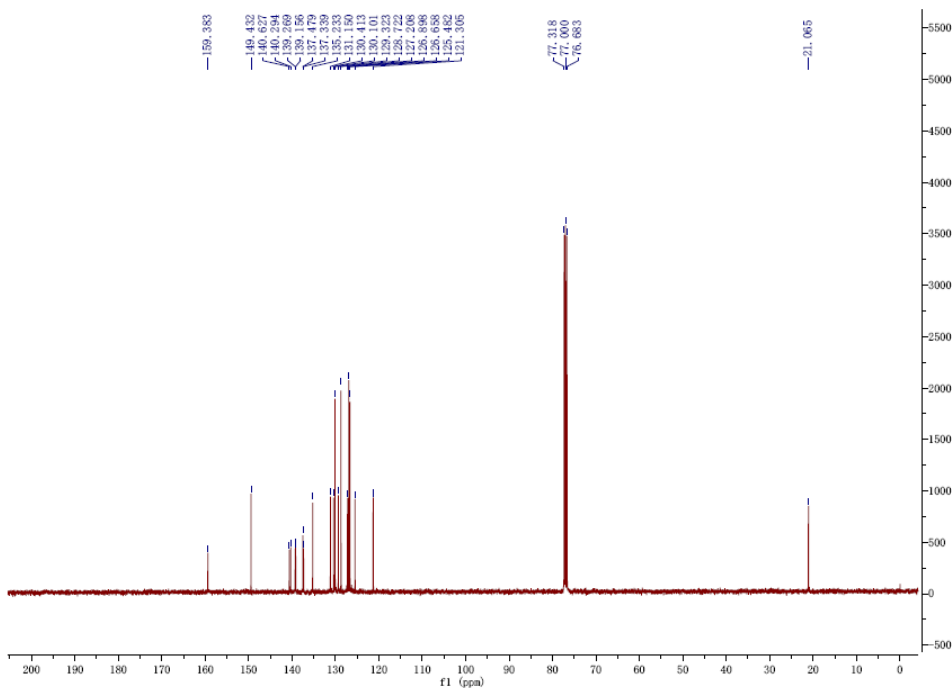

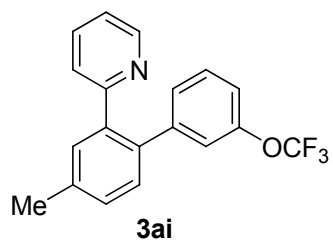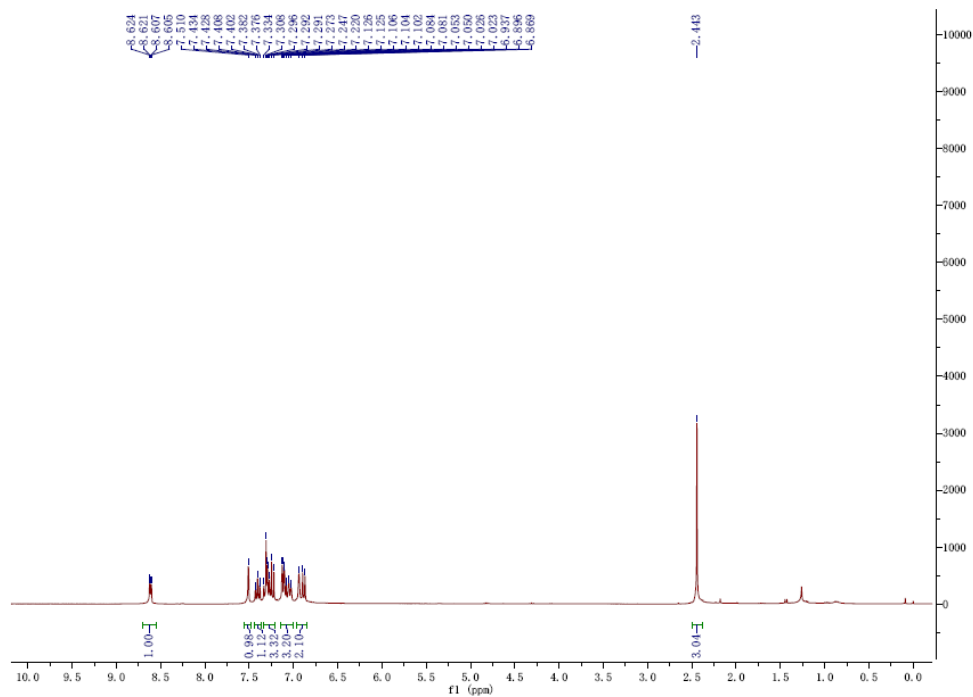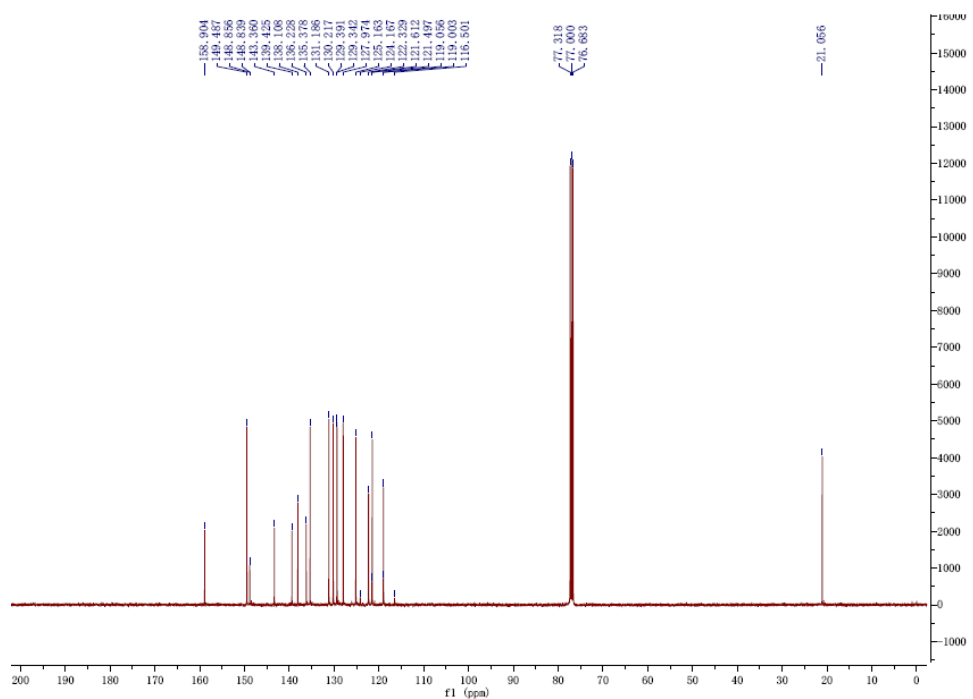

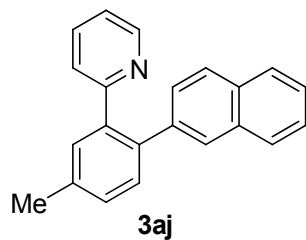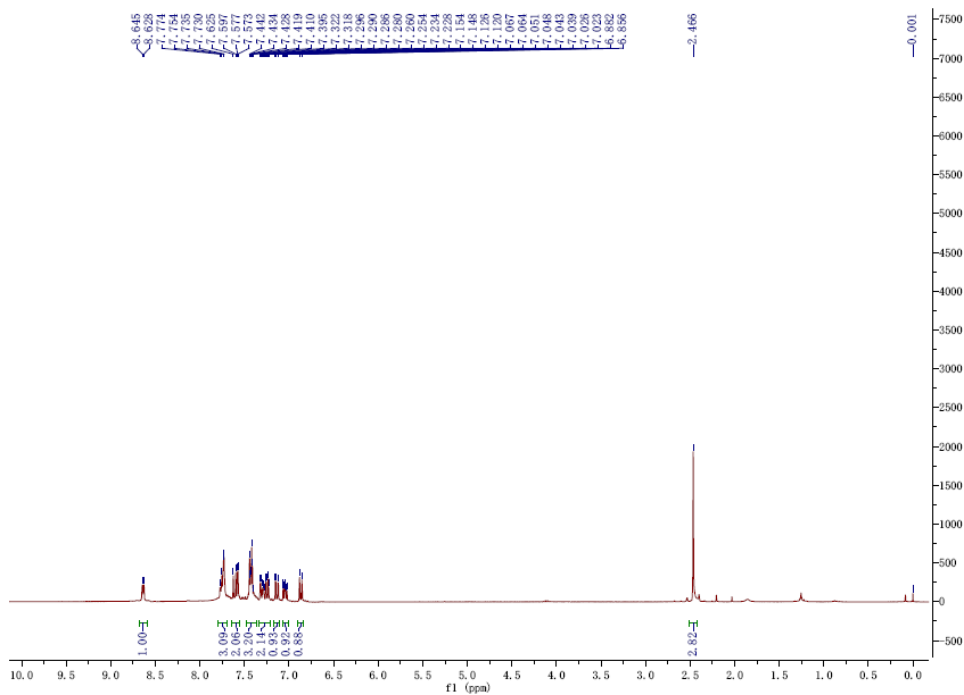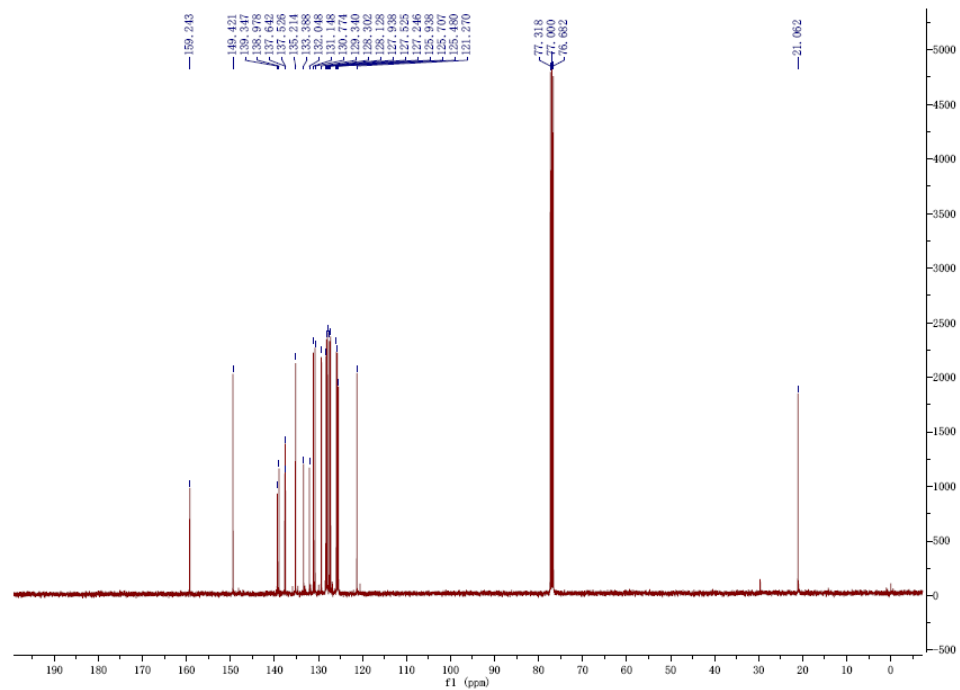

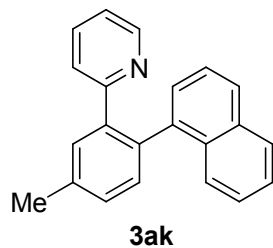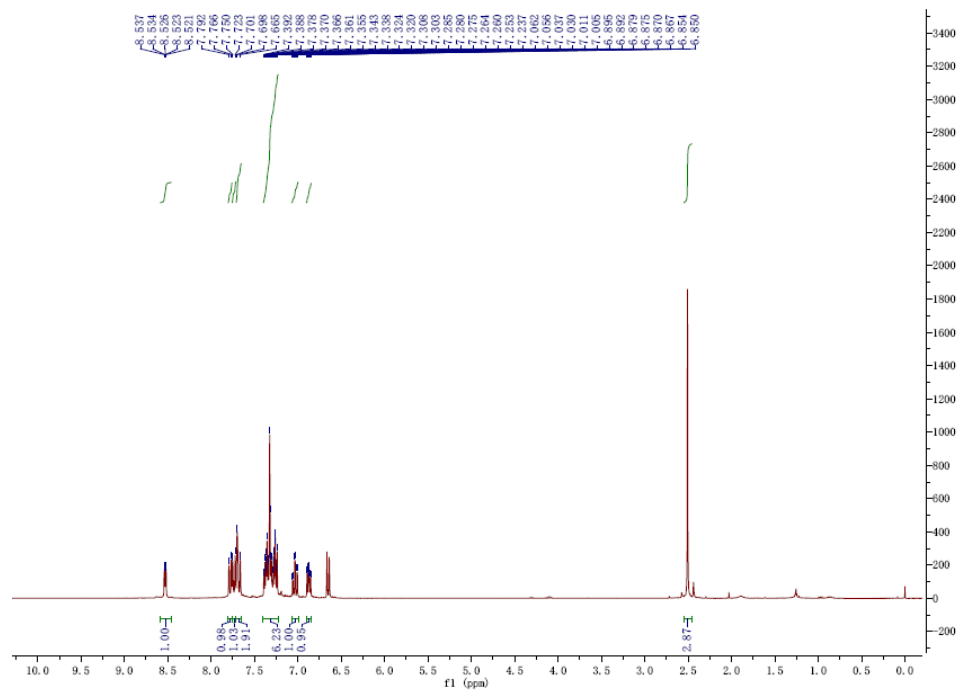

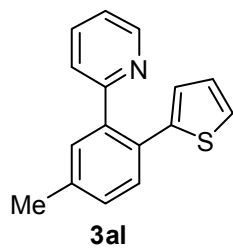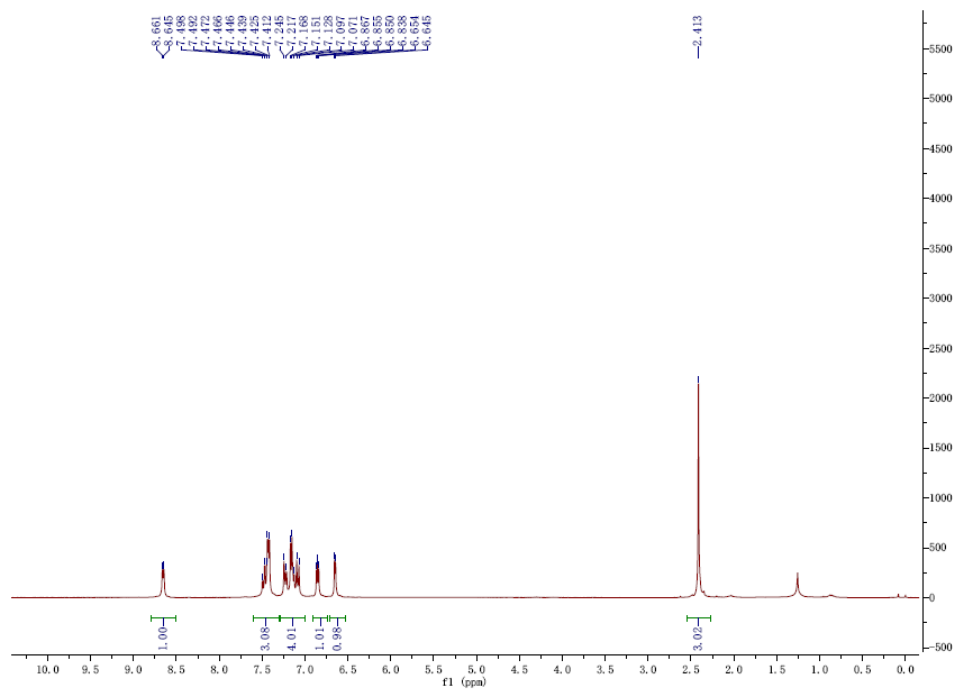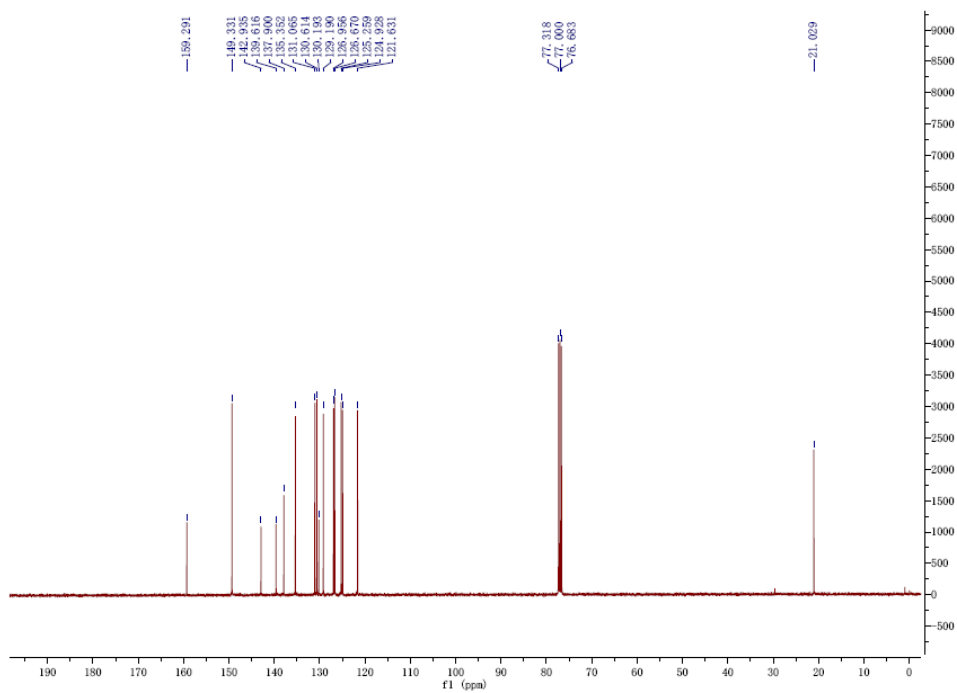

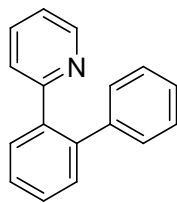

3ba

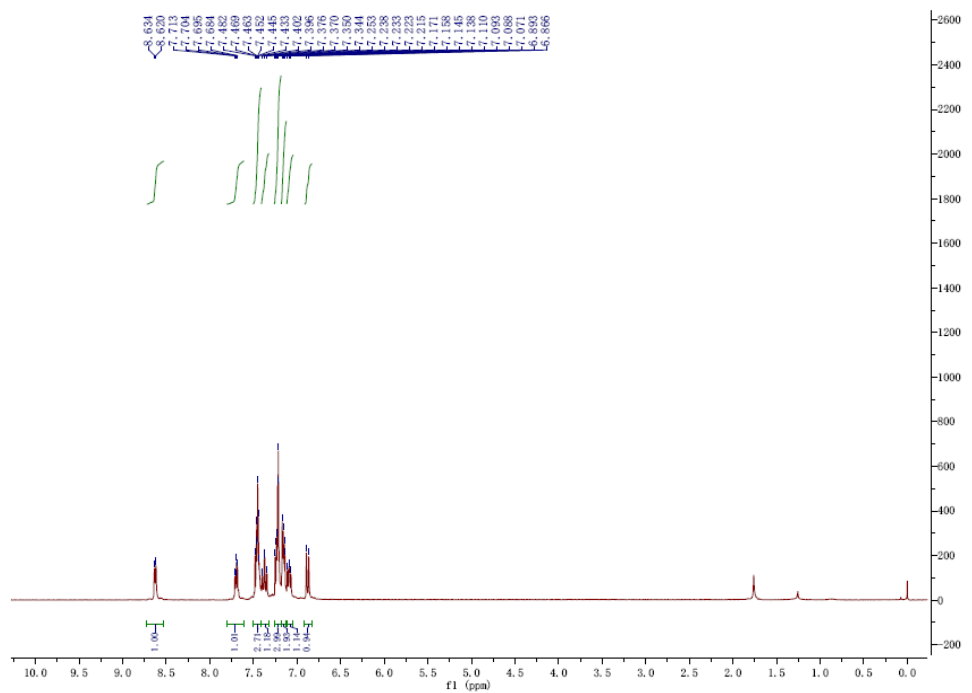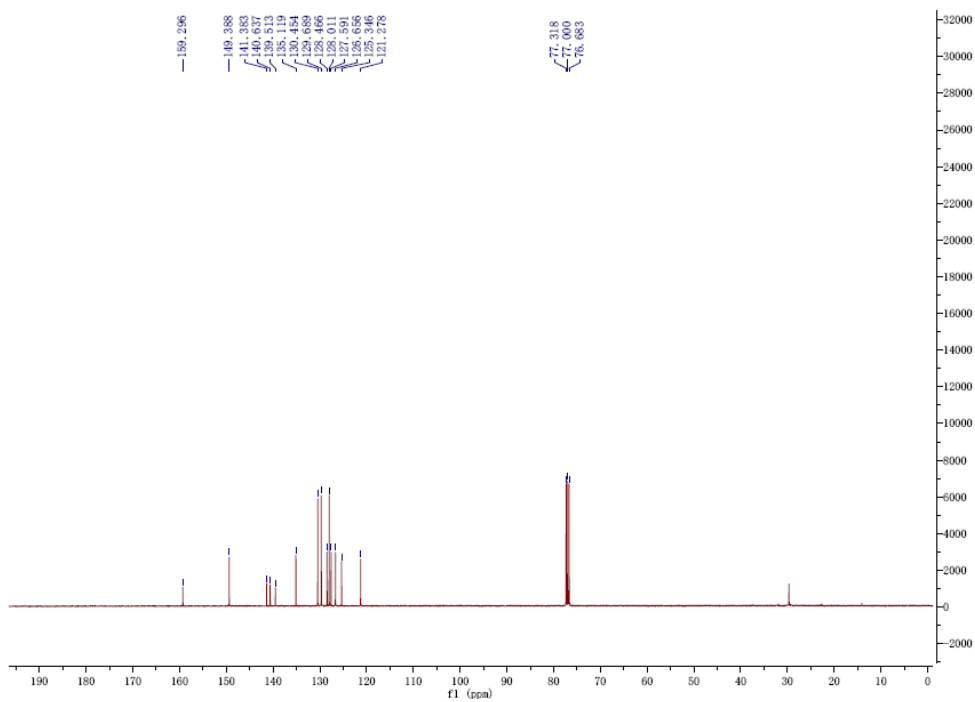

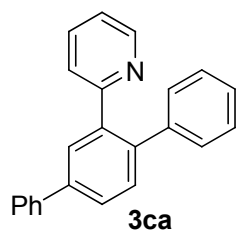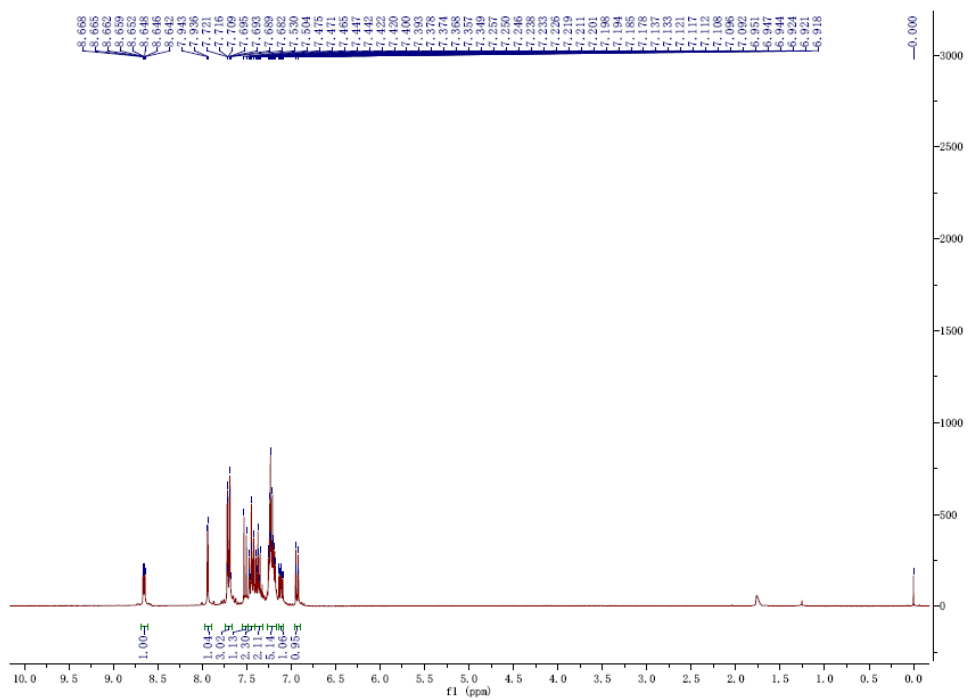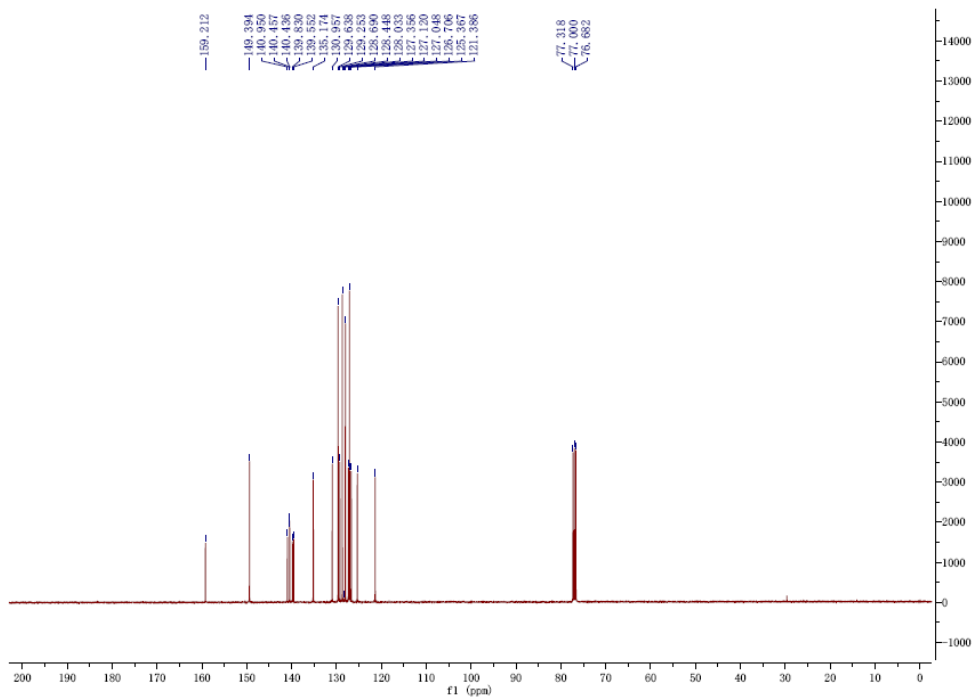



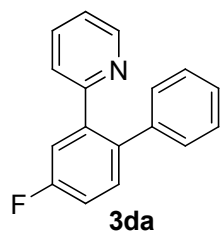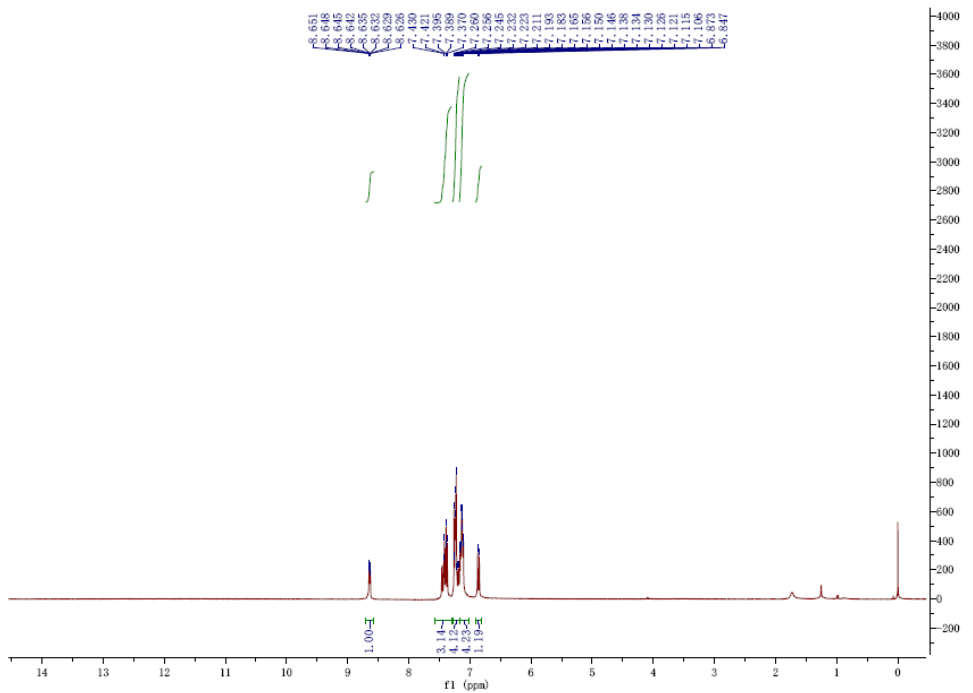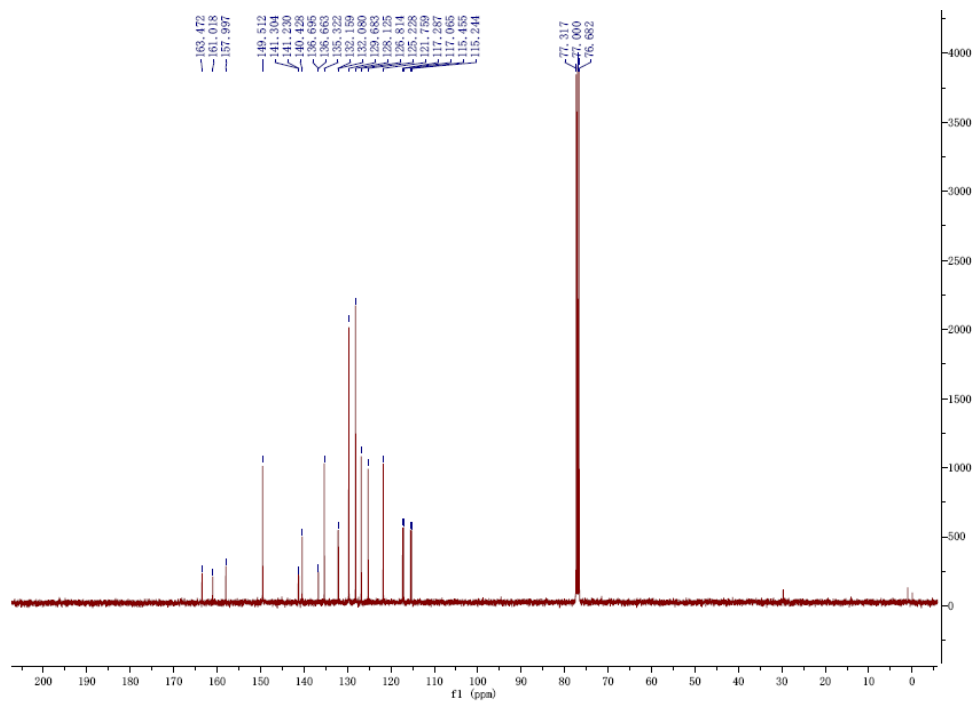

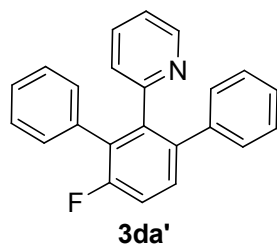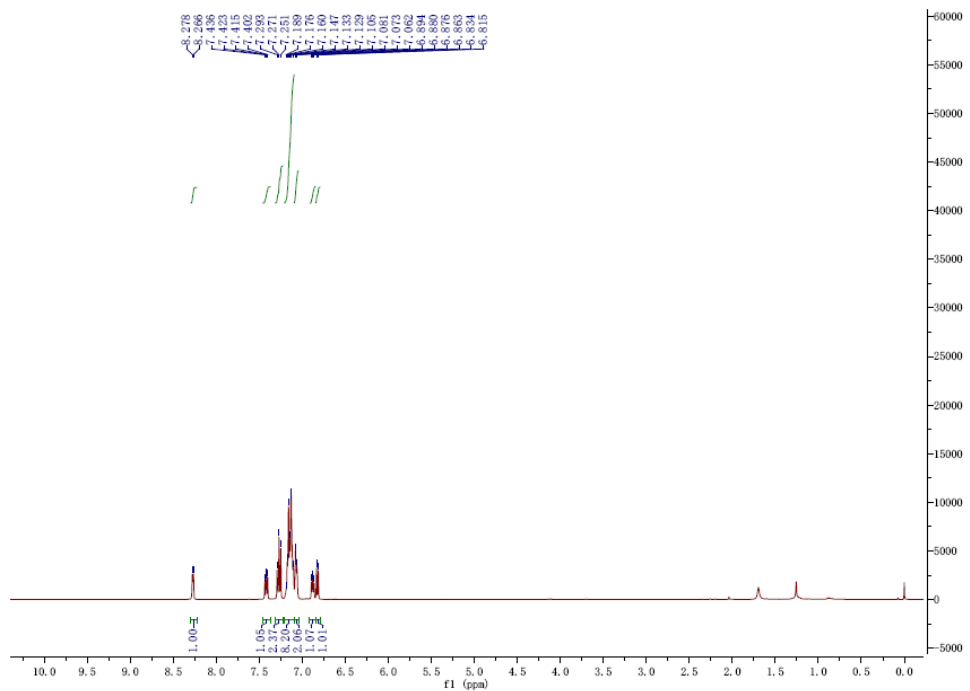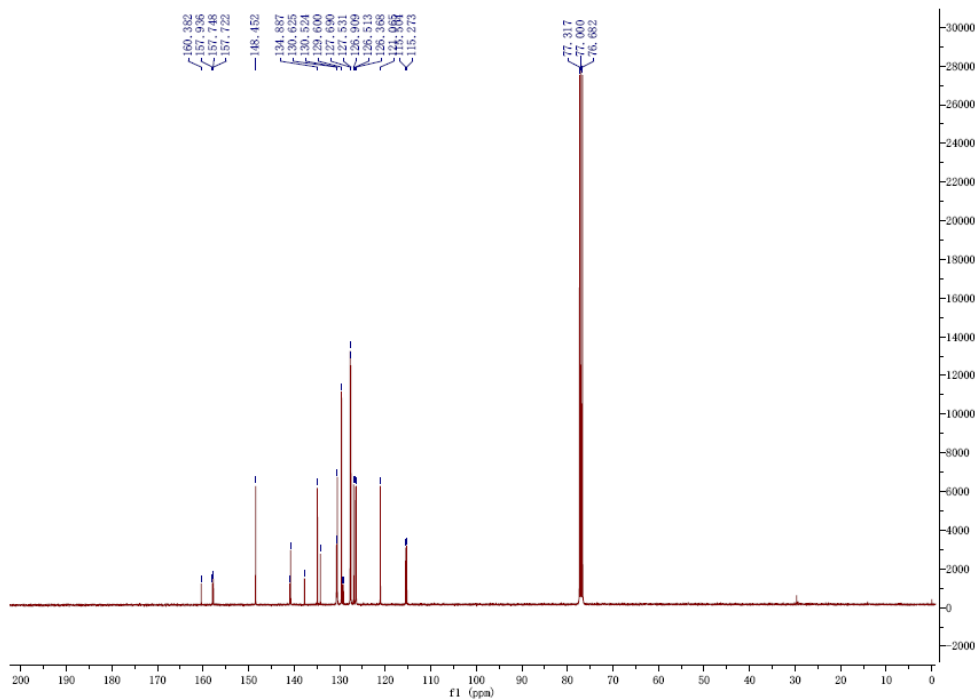

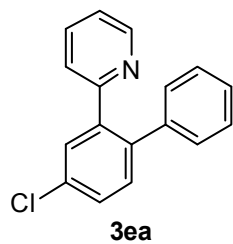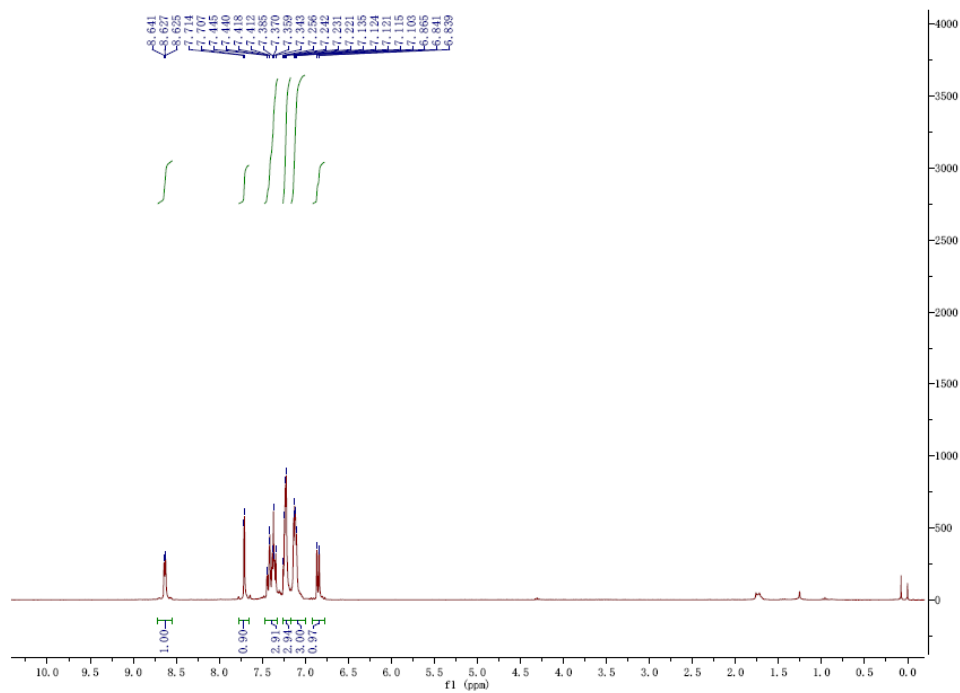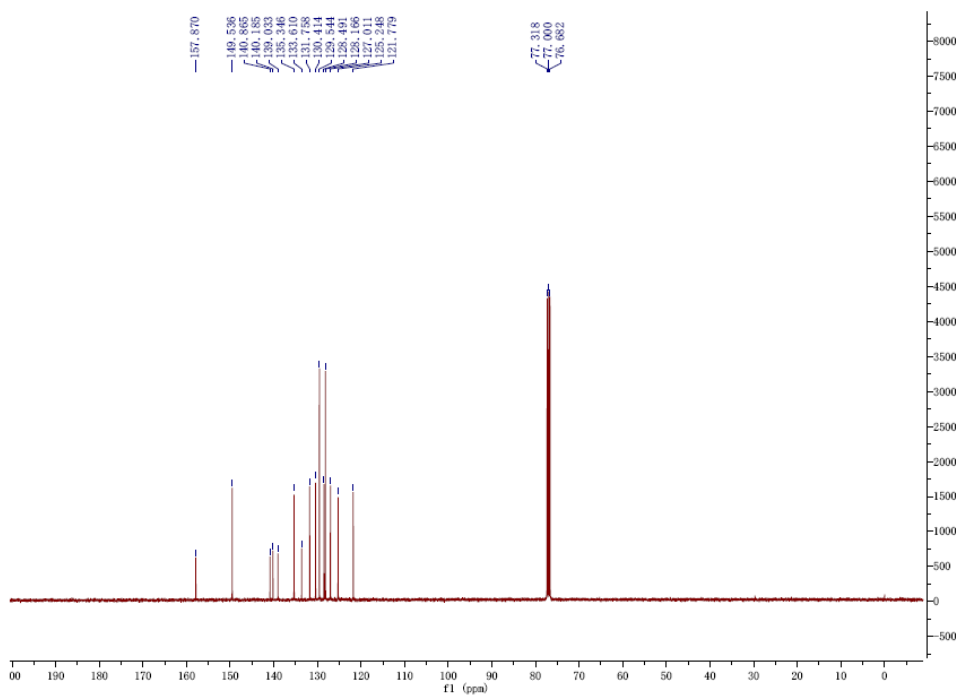

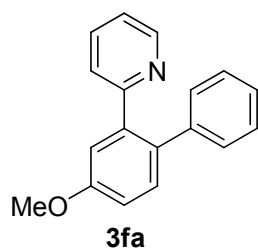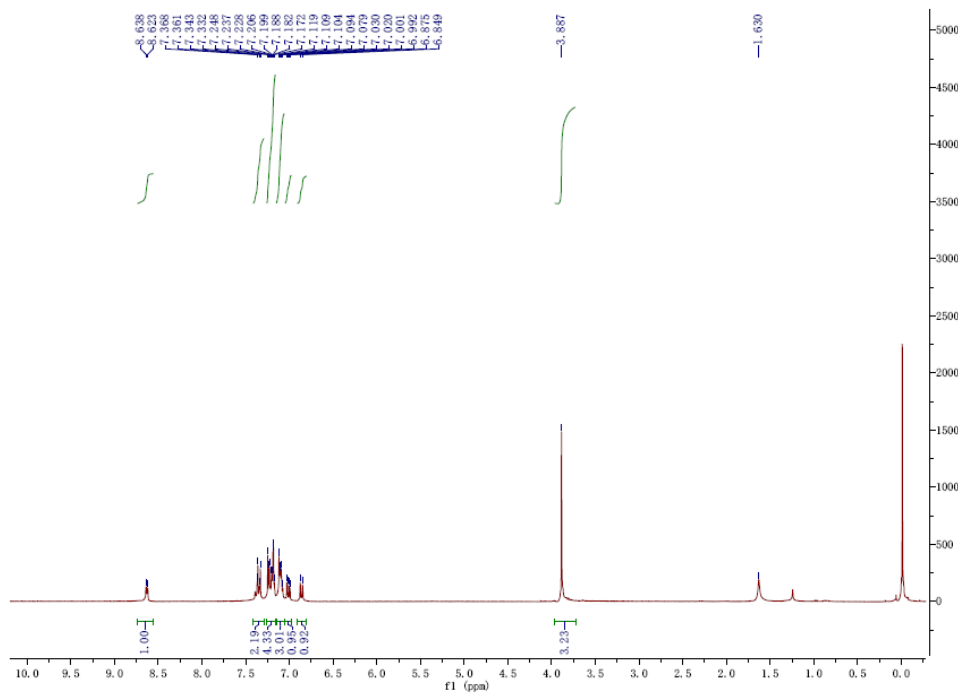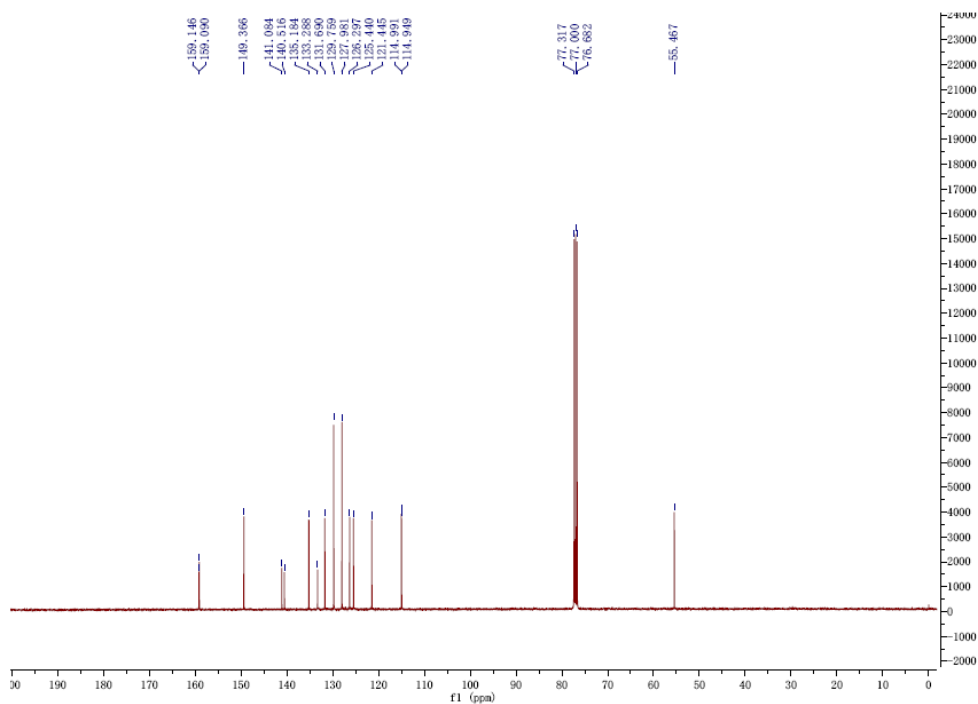

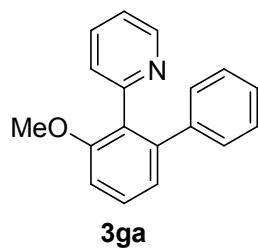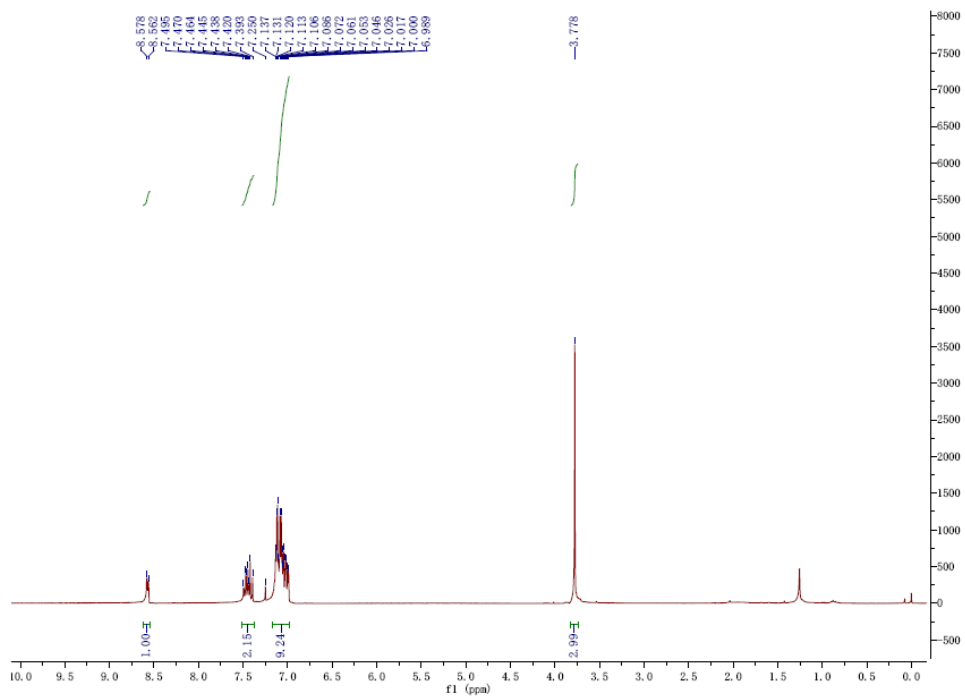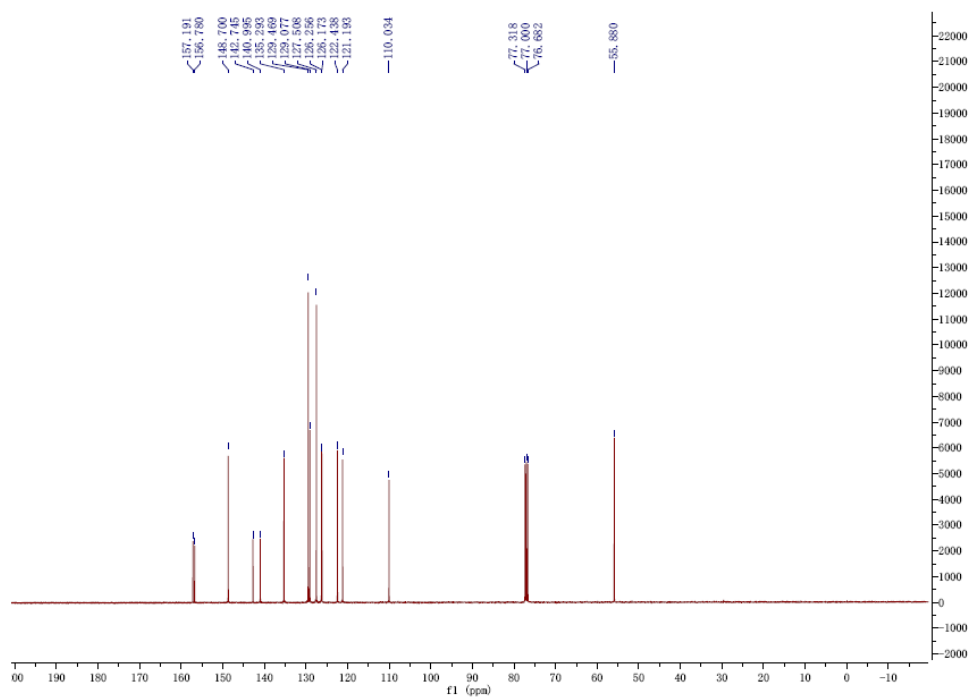

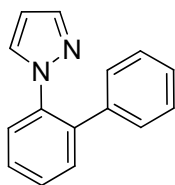

3ha

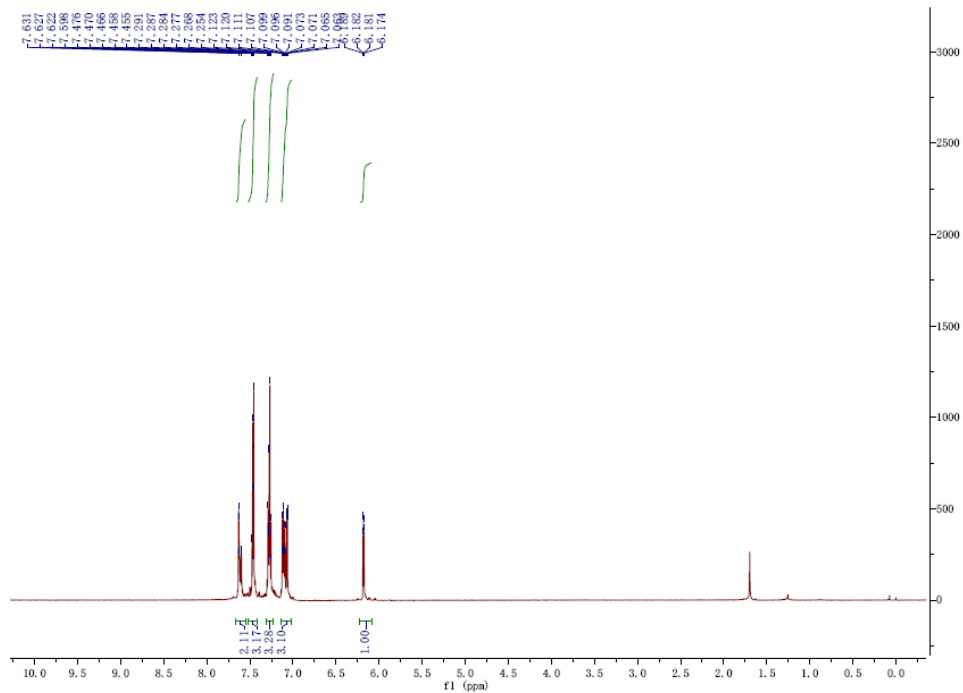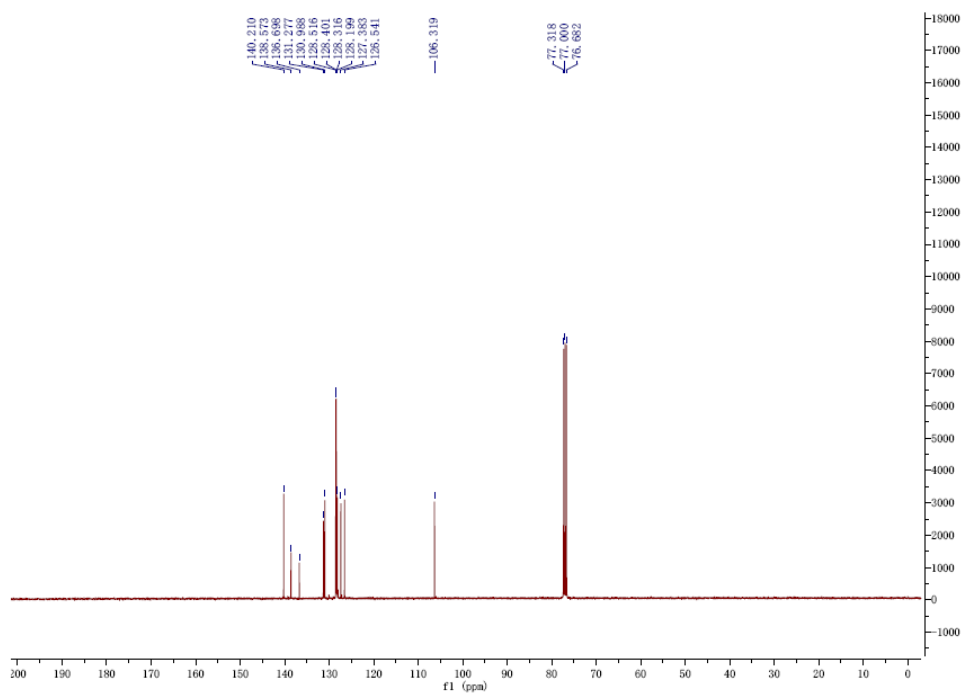

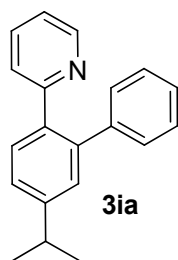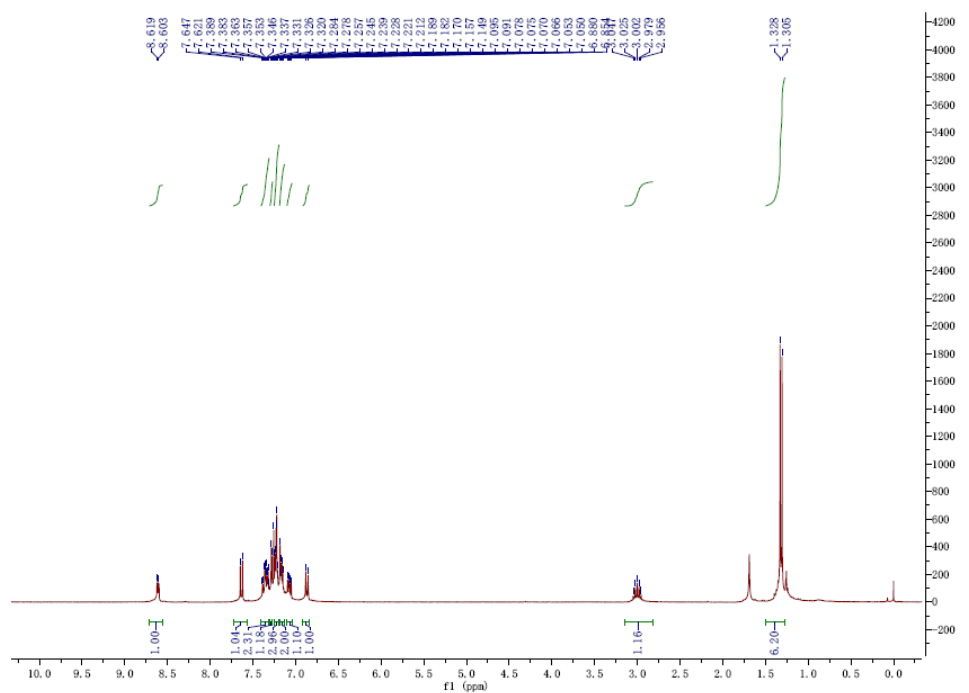

## NMR Spectra of Deuterium Labeling Experiment

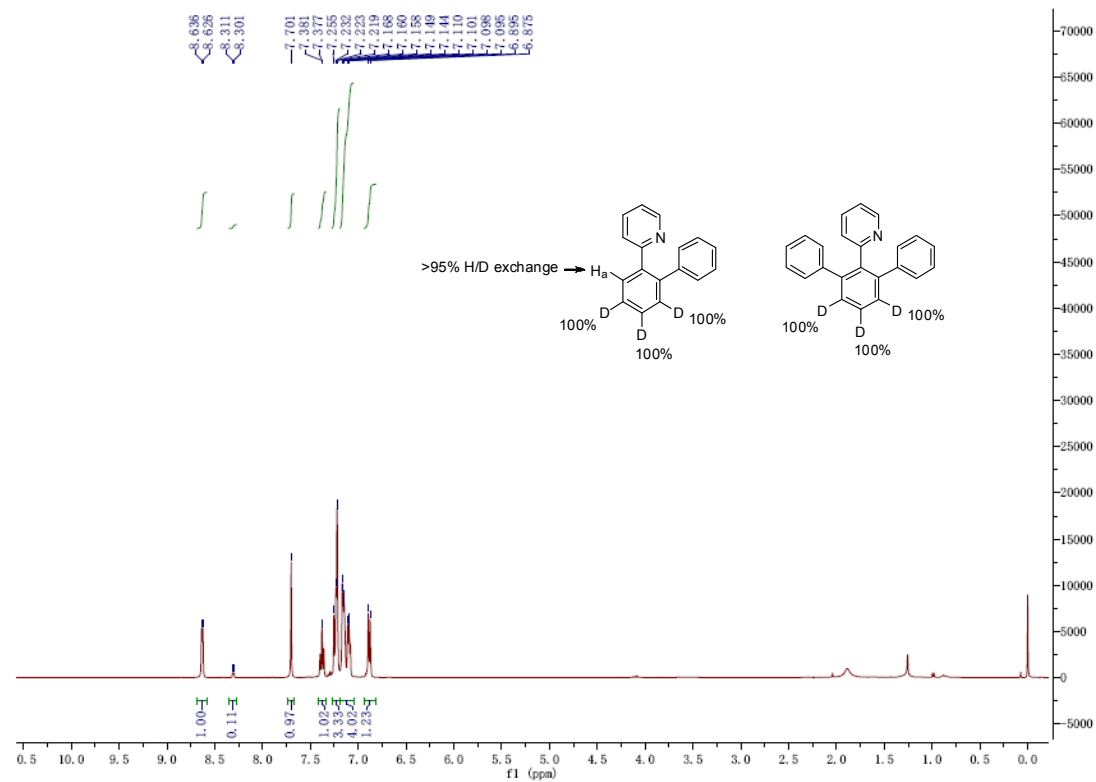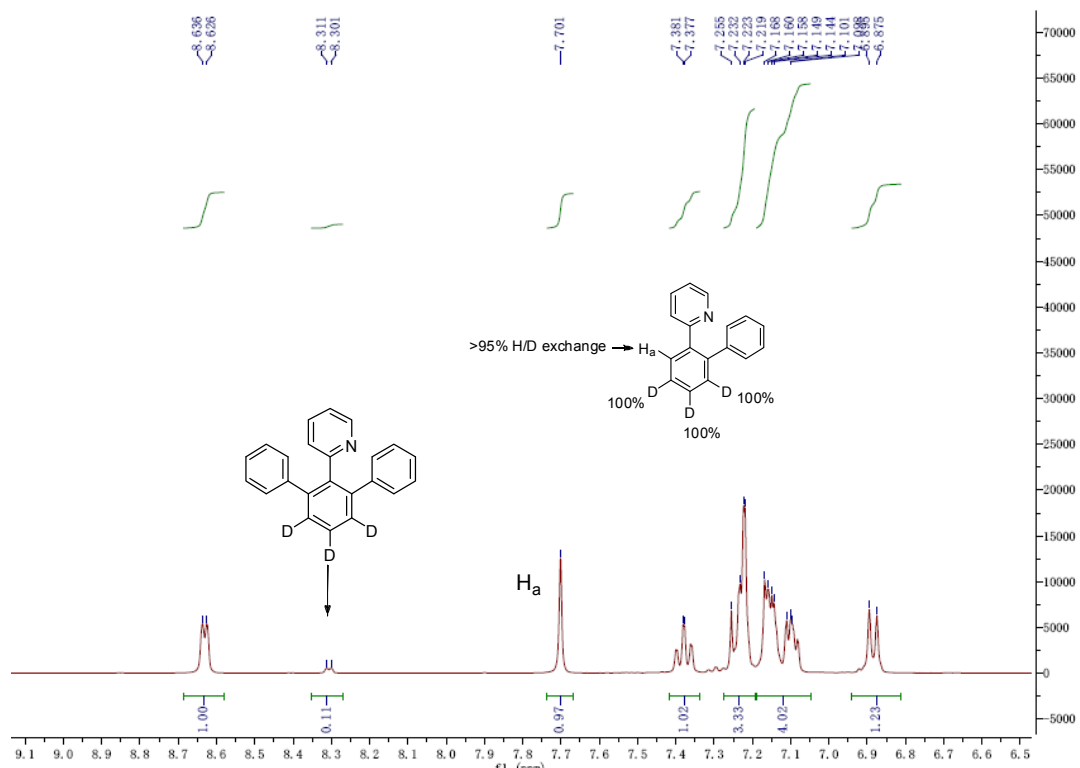



### NMR Spectra of the competition experiment of C—C cleavage versus C—H activation

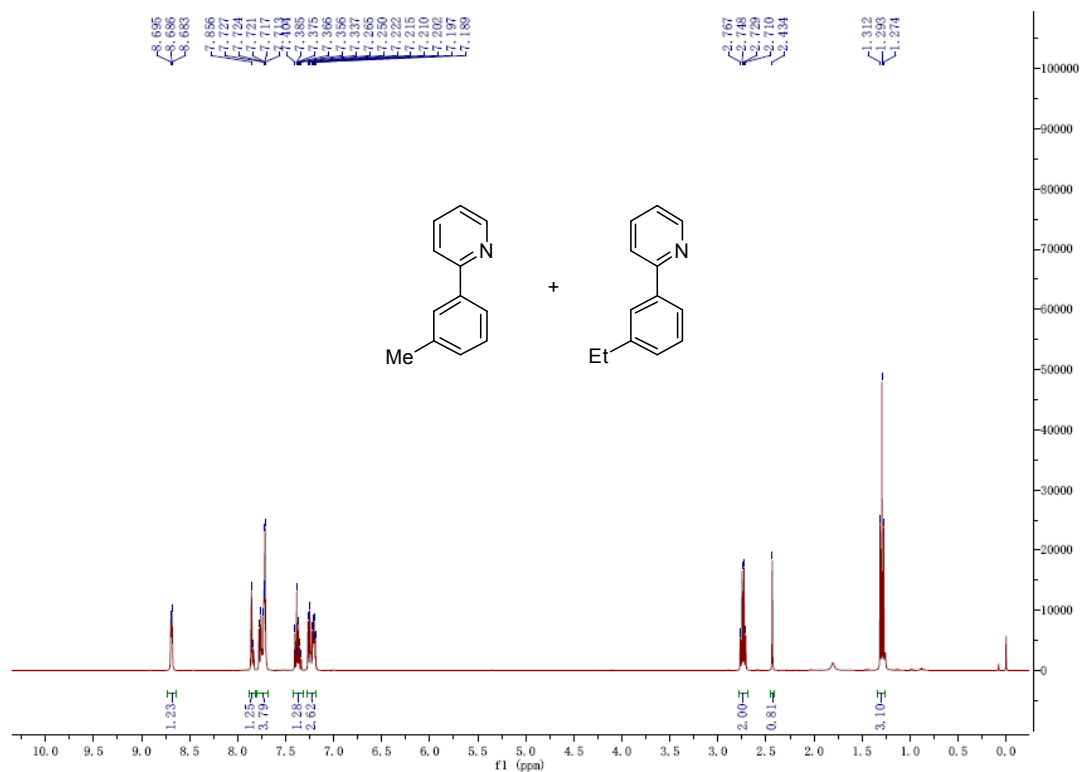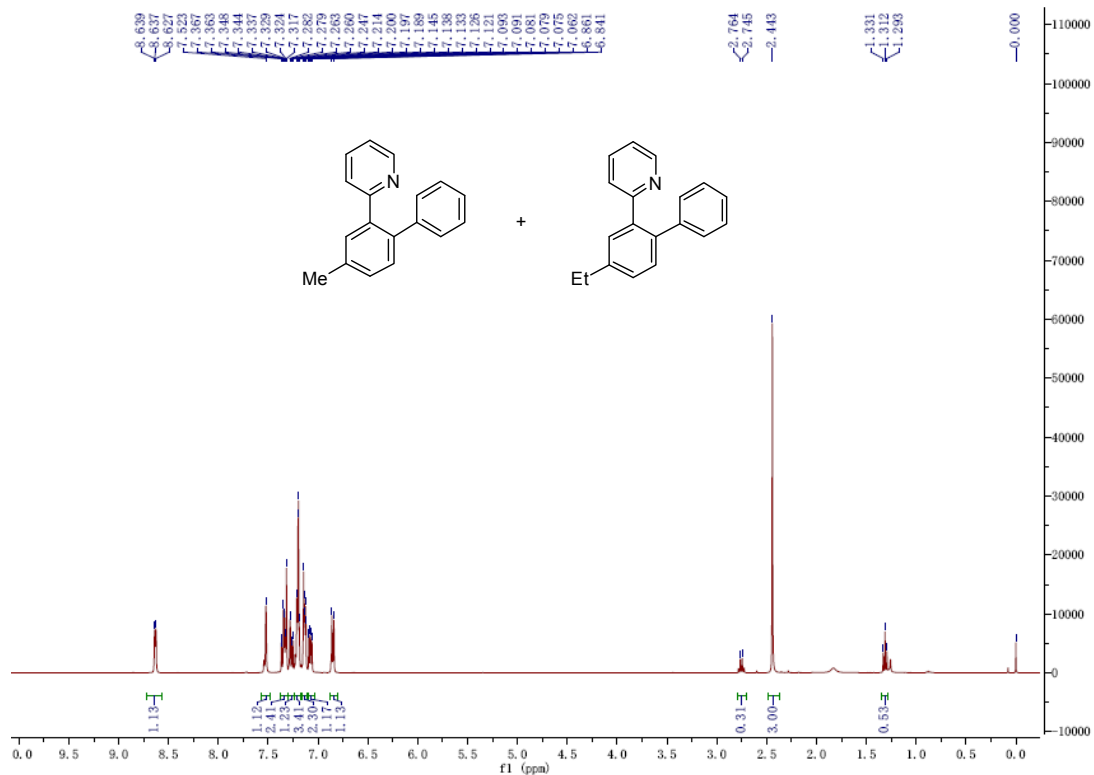

Supplement: c2sc00923d.pdf [file c2sc00923d.pdf]
